1 **Title:** Crop residues in wheat-oilseed rape rotation system: a pivotal, shifting platform for  
2 microbial meetings

3

4 **Authors:** Lydie Kerdraon <sup>1</sup>, Marie-Hélène Balesdent <sup>1</sup>, Matthieu Barret <sup>2</sup>, Valérie Laval <sup>1</sup> \*,  
5 Frédéric Suffert <sup>1</sup> \*

6 \* contributed equally

7

8 **Address:** <sup>1</sup> UMR BIOGER, INRA, AgroParisTech, Université Paris-Saclay, 78850 Thiverval-  
9 Grignon, France; <sup>2</sup> UMR IRHS, INRA, Agrocampus Ouest, Université d'Angers, 49071  
10 Beaucouzé, France

11 \* frederic.suffert@inra.fr; tel +33 (0)1 30 8154 35; ORCID 0000-0001-6969-3878

12 \* valerie.laval@inra.fr; tel +33 (0)1 30 81 45 16; ORCID 0000-0002-3667-3878

13

## 14 **Abstract**

15 Crop residues are a crucial ecological niche with a major biological impact on agricultural  
16 ecosystems. In this study we used a combined diachronic and synchronic field experiment  
17 based on wheat-oilseed rape rotations to test the hypothesis that plant is a structuring factor of  
18 microbial communities in crop residues, and that this effect decreases over time with their  
19 likely progressive degradation and colonization by other microorganisms. We characterized an  
20 entire fungal and bacterial community associated with 150 wheat and oilseed rape residue  
21 samples at a plurennial scale by metabarcoding. The impact of plant species on the residue  
22 microbiota decreased over time and our data revealed turnover, with the replacement of  
23 oligotrophs, often plant-specific genera (such as pathogens) by copiotrophs, belonging to  
24 more generalist genera. Within a single cropping season, the plant-specific genera and species  
25 were gradually replaced by taxa that are likely to originate from the soil. These changes

26 occurred more rapidly for bacteria than for fungi, known to degrade complex compounds.  
27 Overall, our findings suggest that crop residues constitute a key fully-fledged microbial  
28 ecosystem. Taking into account this ecosystem, that has been neglected for too long, is  
29 essential, not only to improve the quantitative management of residues, the presence of which  
30 can be detrimental to crop health, but also to identify groups of beneficial micro-organisms.  
31 Our findings are of particular importance, because the wheat-oilseed rape rotation, in which  
32 no-till practices are frequent, is particularly widespread in the European arable cropping  
33 systems.

#### 34 **Keywords**

35 community succession, microbial diversity, oilseed rape, residue microbiota, wheat

## 36 **Background**

37       Crop residues are an essential living element of agricultural soils. Smil [1] stressed that  
38 they “should be seen not as wastes but as providers of essential environmental services,  
39 assuring the perpetuation of productive agrosystems”. When left in the field in the period  
40 between two successive crops, rather than being buried immediately, crop residues contribute  
41 to the formation of soil organic carbon, improve soil structure, prevent erosion, filter and  
42 retain water, reduce evaporation from the soil surface, and increase the diversity and activity  
43 of micro-organisms in the ground [2]. No-till practices are becoming increasingly widespread,  
44 as they take advantage of these attributes [3]. However, such practices are often considered  
45 likely to increase the risk of disease epidemics [4–6]. Indeed, several leaf-, stem-, head-, and  
46 fruit-infecting micro-organisms, classified as “residue-borne” or “stubble-borne” pathogens,  
47 are dependent on host residues for survival during the period between successive crops and  
48 for the production of inoculum for their next attack [7, 8]. The epidemiological contribution  
49 of residues as an effective source of inoculum is well-established but difficult to quantify [e.g.  
50 9] and generalise, because the nature of survival structures depends on the biology of the  
51 species. The situation is rendered even more complex by the presence of several species  
52 reported to act as crop pathogens in plants as endophytes, without symptom development in  
53 the plant, and in the soil and plant residues as saprophytes. Taking into account the inoculum  
54 from stubble-borne pathogens and possible competition with other micro-organisms, it  
55 appears likely that the expression of a disease is the consequence of an imbalance between a  
56 potentially pathogenic species and the rest of the microbial community, rather than the  
57 consequence of the mere presence of this species [10].

58       Residues constitute a crucial ecological niche, not only for pathogenic species, but also  
59 for non-pathogenic and beneficial species. Residues can be viewed as both a fully-fledged  
60 matrix and a transient compartment, because they originate from the plant (temporal link), are

61 in close contact with the soil (spatial link) and degrade over the following cropping season, at  
62 rates depending on the plant species, the cropping practices used [11], and the year (climate  
63 effect). It remains unknown whether the succession of microbial communities in residues is  
64 driven primarily by plant tissue degradation or edaphic factors [12]. Many studies have  
65 investigated the structure of the microbial communities present during the life cycle of the  
66 plant [e.g. 13–15], but few have investigated the microbiota associated with plant residues.  
67 Several ecological studies have investigated the impact of the residue compartment on the  
68 structure of soil microbial communities [2, 16–19], but not the impact of the soil compartment  
69 on structure of the residue communities. The detritosphere, defined as the part of the soil  
70 attached to residues [12, 20, 21], is the most extensive and broad hotspot of microbial life in  
71 the soil [22]. The residue compartment and the detritosphere are located in close physical  
72 proximity but are considered by microbiologists to be separate trophic and functional niches  
73 [23]. A description of the residue communities and the specific changes in these communities  
74 over time might, therefore, help agronomists to understand the impact of cropping practices  
75 on crop productivity. Fungi and bacteria play important roles in the degradation of plant  
76 tissues in debris (cellulose, hemicellulose, lignin), but the interactions between them within  
77 the microbial community remain unclear, due to the lack of information about their origins  
78 (air-borne, soil-borne or plant-borne), their individual functions and the drivers of community  
79 structure in residues.

80 Crop rotation induces changes in the composition of the soil microbial community and  
81 usually reduces pathogen pressure [e.g. 18]. For instance, wheat yields benefit from “break  
82 crops” such as oilseed rape or other non-host crops to break the life-cycle of wheat-specific  
83 pathogens [24]. We focused here on the wheat-oilseed rape rotation, one of the most widely  
84 used cropping systems in Europe. The areas under bread wheat and oilseed rape in France  
85 were  $5.0 \times 10^6$  ha and  $1.4 \times 10^6$  ha in 2017 [25], respectively. As oilseed rape usually recurs

86 every three years in the rotation and is used almost systematically either directly before or  
87 directly after wheat, we estimate that this classical rotation is used on almost  $4.2 \times 10^6$  ha  
88 every year. Half the area occupied by these two crops is now grown without tillage, with at  
89 least some of the residues of the preceding crop left on the soil [26]. The issue addressed here  
90 is thus directly relevant to more than  $2 \times 10^6$  ha, or about one tenth of the total arable area in  
91 France.

92 In this study, we deliberately focused on crop residues as a neglected, transient, but  
93 fully-fledged half-plant/half-soil compartment without describing the soil microbial  
94 communities, considering that it has been already performed in several studies [e.g. 27, 28].  
95 We tested the specific hypothesis that plant is a structuring factor of bacterial and fungal  
96 communities in residues, and that this effect decreases over time, as contact with the soil  
97 induce progressive colonization of residues by other microorganisms. Over the last few years,  
98 high-throughput metabarcoding has become an indispensable tool for studying the ecology of  
99 such complex microbial communities [29], partly due to the difficulties in isolating fungal and  
100 bacterial species and growing them in axenic conditions. We used this approach to describe  
101 and compare changes in the microbial community of wheat and oilseed-rape residues left on  
102 the soil surface of three cultivated fields during two cropping seasons. We investigated  
103 whether the three main determinants (plant species, cropping season, and rotation) of the  
104 diversity of fungal and bacterial communities affected the microbiota of crop residues.

105

## 106 **Methods**

### 107 **Experimental design**

108 *Field plots and rotations* – An extensive field experiment based on a wheat (W)-oilseed  
109 rape (O) rotation cropping system was carried out during the cropping seasons of 2015-2016  
110 and 2016-2017 at the Grignon experimental station (Yvelines, France; 48°51'N, 1°58'E). This

111 area is characterised by an oceanic climate (temperate, with no dry season and a warm  
112 summer). A combined diachronic and synchronic strategy [30] was used to investigate the  
113 dynamics of the residue microbial communities both over a two-year period on the same plot  
114 and along a chronosequence substituting spatial differences (three plots) for time differences.  
115 A first monoculture plot (WWW) was sown with the winter wheat cultivar Soissons. This plot  
116 had been cropped with wheat since 2007 and was used in previous epidemiological studies  
117 focusing on the impact of wheat debris on the development of *Septoria tritici* blotch [e.g. 31,  
118 32, 33]. Two other plots were cropped with oilseed rape cv. Alpaga and wheat cv. Soissons in  
119 rotation (OWO, adjacent to the WWW plot, and WOW, located 400 m away; Fig. 1). The  
120 OWO and WWW plots are characterized by a silty clay loam soil, and plot WOW is  
121 characterized by a silty loam soil (Additional file 1: Table S1). The three plots were not tilled  
122 during the two cropping seasons. The wheat and oilseed rape residues were left on the soil  
123 surface after harvest and partially buried to a depth of 10 cm with a disc harrow 6 weeks later  
124 (late September). Crops were managed in a conventional way following local practices  
125 (nitrogen fertilization, insecticide and herbicide treatments). No fungicide was sprayed on the  
126 leaves during the study.

127 *Residue sampling* - Wheat and oilseed rape residues (150 samples) were collected over  
128 the two cropping seasons. The changes in the microbial communities during residue  
129 degradation were described on the basis of four sampling periods (October, December,  
130 February, and May; Additional file 1: Table S2). A supplementary sample was taken in July  
131 2016, and *a posteriori* in July 2017, to characterise the plant microbiota before the residues  
132 came into contact with the soil. For each sampling period, twelve pieces of wheat residue or  
133 four pieces of oilseed rape residue were collected from five points in each plot, 20 m apart  
134 (Fig. 1).

135           *DNA extraction* - Residues were cut to take off remaining roots, washed to remove the  
136 soil and air-dried in laboratory conditions. They were then cut into small pieces, pooled in a  
137 50 mL bowl and crushed with a Retsch™ Mixer Mill MM 400 for 60 seconds at 30 Hz in  
138 liquid nitrogen, in a zirconium oxide blender. The crushed powder was stored in 50 mL  
139 Falcon tubes at -80°C until DNA extraction. We transferred 40 mg of crushed residues to a 2.0  
140 mL Eppendorf tube, which was stored to -80°C. Total environmental DNA (eDNA) was  
141 extracted according to the TriZol® Reagent protocol (Invitrogen, according to the  
142 manufacturer's instructions). Two independent extractions were performed per sample, giving  
143 a total of 300 eDNA samples. The two extractions were considered to be technical replicates.

144

#### 145 **PCR and Illumina sequencing**

146           Fungal and bacterial community profiles were estimated by amplifying ITS1 and the  
147 v4 region of the 16S rRNA gene, respectively. Amplifications were performed with the  
148 ITS1F/ITS2 [34] and 515f/806r [35] primers. All PCRs were run in a reaction volume of 50  
149 µL, with 1x Qiagen Type-it Multiplex PCR Master Mix (Type-it® Microsatellite PCR kit Cat  
150 No./ID: 206243), 0.2 µM of each primer, 1x Q-solution® and 1 µL DNA (approximately 100  
151 ng). The PCR mixture was heated at 95°C for 5 minutes and then subjected to 35 cycles of  
152 amplification [95°C (1 min), 60°C (1 min 30 s), 72°C (1 min)] and a final extension step at  
153 72°C (10 min). PCR products were purified with Agencourt® AMPure® XP (Agencourt  
154 Bioscience Corp., Beverly, MA). A second round of amplification was performed with 5 µL of  
155 purified amplicons and primers containing the Illumina adapters and indexes. PCR mixtures  
156 were heated at 94°C for 1 min, and then subjected to 12 cycles of amplification [94°C (1  
157 min), 55°C (1 min), 68°C (1 min)] and a final extension step at 68°C (10 min). PCR products  
158 were purified and quantified with Invitrogen QuantIT™ PicoGreen®. Purified amplicons  
159 were pooled in equimolar concentrations, and the final concentration of the library was

160 determined with the qPCR NGS library quantification kit (Agilent). Libraries were sequenced  
161 in five independent runs with MiSeq reagent kit v3 (600 cycles).

162

### 163 **Sequence processing**

164 Fastq files were processed with DADA2 v1.6.0 [36], using the parameters described in  
165 the workflow for “Big Data: Paired-end” [37]. The only modification made relative to this  
166 protocol was a change in the truncLen argument according to the quality of the sequencing  
167 run. Taxonomic affiliations for amplicon sequence variants (ASV) generated with DADA2  
168 were assigned with a naive Bayesian classifier on the RDP trainset 14 [38] and the UNITE 7.1  
169 database [39].

170 Only ASV detected in both technical replicates were conserved for further analyses  
171 [40], to ensure robustness. ASV classified as “Chloroplast”, “Anthophyta”, “Arthropoda”,  
172 “Cercozoa” or not classified at the phylum level were discarded from the datasets. The  
173 remaining ASV were normalised according to the proportion of reads within each sample  
174 [41].

175

### 176 **Microbial community analyses**

177 Microbial community profiles were obtained for 100 wheat residue samples and 50  
178 oilseed rape residue samples. The diversity of each sample was estimated by calculating the  
179 Shannon index with the ggpubr package in R [42]. A Kruskal-Wallis test was performed to  
180 assess significant differences in residue diversity with time, between plants within a rotation  
181 and between cropping seasons. In cases of significant differences, Wilcoxon pairwise tests  
182 were performed to compare sampling periods. A Wilcoxon pairwise test was performed to  
183 assess the effects of “plant” and “plant within a rotation” on Shannon index for each cropping  
184 season. Divergences were considered significant if  $p < 0.05$ .



185 “Plant” (i.e. crop), “crop within a rotation” and “cropping season” effects on community  
186 composition were assessed by multidimensional scaling (MDS) on the Bray-Curtis  
187 dissimilarity index with the phyloseq package in R (version 1.22.3 [43]). The effects of plant,  
188 cropping season, sampling period and biological sample on community composition were  
189 assessed with PERMANOVA, using the Adonis function of the vegan R package (version 2.4-  
190 4 [44]). After the aggregation of ASV for each sampling condition “sampling period/cropping  
191 year \* crop within a rotation”, the betapart R package [45] was used to determine whether  
192 temporal changes in community composition were due to turnover (i.e. replacement of ASV  
193 between two sampling periods) or nestedness (gain or loss of ASV between two sampling  
194 periods). The effect of the plant on the microbial communities associated with residues during  
195 degradation was also assessed with PERMANOVA on each sampling period, for each year.

196 The genus composition of fungal and bacterial communities was assessed with a  
197 cladogram based on genus names. Only genera observed in three biological samples harvested  
198 on the same plot were incorporated into the cladogram. A cladogram representing the number  
199 of ASV for each genus, read percentage, occurrence and distribution for each sample, was  
200 constructed with the Interactive Tree Of Live (iTOL [46]) online tool for phylogenetic trees.

201 To illustrate taxonomic changes over time, especially between plant-derived  
202 communities and communities involved later in the colonization of the residues, we focused  
203 on seasonal shifts (increase, decrease or stability) in the relative abundance of a selection of  
204 some fungal and bacterial genera and tested their statistical significance (Wilcoxon tests  
205 between sampling periods).

206

## 207 **Results**

208 The bacterial and fungal communities associated with wheat (W) and oilseed rape (O) crop  
209 residues were characterised on three plots: a wheat monoculture (WWW), and two oilseed

210 rape-wheat rotation plots (WOW and OWO) (Fig. 1). We assessed the composition of these  
211 microbial communities four times per year, during two consecutive cropping seasons (in  
212 October, December, February and May). An additional time point (in July) was also included  
213 for identification of the micro-organisms present on the plant before contact with the soil  
214 (Additional file 1: Table S2). An analysis of raw sequence datasets for the 150 samples of  
215 wheat and oilseed rape residues collected over the two cropping seasons resulted in the  
216 grouping of 14,287,970 bacterial and 9,898,487 fungal reads into 2,726 bacterial and 1,189  
217 fungal amplicon sequence variants (ASV). ASV not detected in both technical replicates  
218 (5.4% of bacterial reads and 1.5% of fungal reads; Additional file 1: Table S3) were removed  
219 from the datasets.

220

## 221 **Alpha diversity**

222 *Fungal and bacterial diversity was influenced by cropping season* – Diversity  
223 dynamics, assessed by calculating the Shannon index, differed between the two cropping  
224 seasons and between fungi and bacteria. It was influenced only slightly by the type (or the  
225 absence) of rotation (Fig. 2). Fungal diversity increased over time during the first cropping  
226 season, whereas the differences between the samples in the second year did not reflect a  
227 gradual increase. Bacterial diversity did not increase during the first cropping season, except  
228 for wheat residues in rotation (WOW). During the second year, diversity increased from  
229 December to May, for all conditions. The impact of climatic conditions during residue  
230 degradation (Additional file 1: Table S4) or differences in initial diversity on the plant before  
231 harvest may explain the less marked trends observed between the two cropping seasons.

232 *Fungal and bacterial diversity are influenced by plant species and rotation* – Oilseed  
233 rape residues supported less fungal diversity than wheat residues in 2015-2016, but not in  
234 2016-2017 (Additional file 1: Table S6). The opposite trend was observed for bacteria:

235 bacterial diversity in oilseed rape was significantly lower than that in wheat in 2016-2017, but  
236 there was no difference in bacterial diversity between the two crops in 2015-2016. In addition,  
237 the Shannon index was significantly higher in wheat grown in monoculture than in wheat  
238 grown in rotation for both years for fungi and in 2015-2016 for bacteria.

239

## 240 **Comparison of microbial communities associated with residues**

241 We analysed the effects of plant species, rotation, cropping season and sampling  
242 period on communities, using the Bray-Curtis index and PERMANOVA. Differences between  
243 sample replicates collected from the same plot during the same sampling period were not  
244 significant for bacterial or fungal communities (Table 1). Thus, there was remarkably little  
245 heterogeneity between the samples from the same plot, and the number of biological samples  
246 was, therefore, sufficient to assess differences due to the variables of interest (i.e. plant  
247 species, rotation, cropping season and sampling period).

248 *The structure of bacterial and fungal communities is influenced by plant species and*  
249 *rotation* – Oilseed rape and wheat residues presented different sets of ASV, for both bacterial  
250 and fungal communities (Fig. 3). Plant species was the main factor explaining differences  
251 between the communities, accounting for 22.7% of the variance for bacteria and 32.4% for  
252 fungi (Table 1). The effect of plant species on fungal community structure decreased over  
253 time, while the effect of plant species on bacterial community structure tended to increase  
254 between October and December (Additional file S1: Table S5). For wheat, the type of rotation  
255 (i.e. rotation or monoculture) accounted for 10.5% of the variance for fungal community  
256 composition and 6.6% of the variance for bacterial community composition (Table 1).

257 *Community structures change over time* – Cropping season was the main temporal  
258 factor underlying changes in community structure, accounting for 16.4% of the variance for  
259 bacteria and 12.5% of the variance for fungi (Table 1). Sampling period also had a significant

260 impact on community composition, accounting for 17.2% of the variance for bacteria and  
261 7.2% of the variance for fungi. Theoretically, changes in ASV composition result from  
262 turnover (replacement of ASV between two sampling periods) and nestedness (gain or loss of  
263 ASV between two sampling periods [45]). We found that the dissimilarity between sampling  
264 periods was smaller for bacterial than for fungal ASV structure. By breaking down the  
265 dissimilarity between sampling periods, we found that most of the changes in fungal and  
266 bacterial ASV structure were due to turnover (Additional file 1: Table S7). Furthermore, we  
267 found that nestedness had a greater impact on bacterial communities than on fungal  
268 communities.

269

#### 270 **Changes in communities, by genus**

271 Community succession across the different sampling dates was explained largely by the  
272 turnover of ASV. We characterised potential taxonomic differences in communities over time  
273 by analysing wheat and oilseed rape residues separately. ASV were aggregated together at  
274 genus level, resulting in 84 fungal (Fig. 4) and 184 bacterial genera (Additional file 1: Fig. S1,  
275 S2) for wheat, and 63 fungal (Fig. 5) and 186 bacterial genera (Additional file 1: Fig. S3, S4)  
276 for oilseed rape. For both plant species, we identified genera that disappeared or displayed a  
277 significant decrease in relative abundance over time (Additional file: Fig. S5). Among these  
278 genera, some are known to be associated with plants, such as *Alternaria*, *Acremonium* [14,  
279 47, 48], *Cryptococcus* [49], *Sarocladium* [50] and *Cladosporium* [13, 47–50].

280 Some of the fungal species detected on wheat, such as *Oculimacula yallundae* (all  
281 ASV of *Oculimacula* genera), *Zymoseptoria tritici* and *Pyrenophora tritici-repentis*, are  
282 known to be pathogenic. Some of the species detected on oilseed rape, such as *Verticillium*  
283 spp., *Leptosphaeria maculans* (= *Plenodomus maculans*) and *Leptosphaeria biglobosa* (=  
284 *Plenodomus biglobosa*), are also known to be pathogenic. Strikingly, *L. maculans* and *L.*

285 *biglobosa* predominated over the other taxa. *Verticillium longisporum*, *V. dahlia* and *V. albo-*  
286 *atrum* were mostly detected during the second sampling year. As samples were collected in  
287 two different fields, it was not possible to determine whether the occurrence of *Verticillium*  
288 spp., a soil-borne pathogen complex causing *Verticillium* wilt [51], was affected more by year  
289 or by the soil contamination. *Acremomium*, *Clonostachys* and *Alternaria* genera, which have  
290 also been described as associated with plants [52], were detected in the early sampling periods  
291 (Additional file: Fig. S5). Their relative abundances decreased over time. Most of the genera  
292 that were not present at early sampling points and with relative abundances increasing over  
293 time (e.g. *Coprinellus*, *Psathyrella*, *Torula*, *Tetracladium*, and *Exophiala*) were common to  
294 wheat and oilseed rape residues. These genera can thus be considered as probably derived  
295 primarily from the surrounding soil.

296 For bacteria, the difference in the genera detected between the two plants species was  
297 less marked than for fungi, as 146 genera were common to wheat and oilseed rape residues.  
298 These 146 genera corresponded to the 98.7% most prevalent reads for wheat and 97.5% most  
299 prevalent genus reads for oilseed rape. *Proteobacteria* was the predominant phylum the first  
300 year. The most prevalent proteobacterial subgroup was *Alphaproteobacteria*, with a high  
301 prevalence of *Rhizobiales* and *Sphingomonadales*. *Rhizobium* and *Neorhizobium*, two major  
302 genera from *Rhizobiales*, decreased in abundance between October and May in both wheat  
303 and oilseed rape. *Sphingomonadales* genera were much more abundant on wheat than on  
304 oilseed rape, especially *Sphingomonas*. *Bacteroidetes* genera, including *Pedobacter* in  
305 particular, were frequently detected and their prevalences tended to be stable for oilseed rape  
306 residues, and to decrease for wheat residues. In parallel, an increase in *Actinobacteria*,  
307 particularly *Nocarioides*, was observed. Major differences between July and October were  
308 observed for oilseed rape, consistent with the beta-diversity analysis, in which the percentage  
309 dissimilarity between July and October was high, due to both species extinction and turnover.

310 *Gammaproteobacteria* were highly abundant on oilseed rape in July. Their frequency then  
311 decreased rapidly from October to May, due largely to the decrease in *Pseudomonas*. In  
312 parallel, we observed an increase in the levels of *Alphaproteobacteria*, especially *Rhizobium*  
313 and *Sphingomonas*, between July and October. A small decrease in levels of  
314 *Gammaproteobacteria* was observed between July and October for wheat in rotation, whereas  
315 the percentage of reads associated with this class increased between July and December for  
316 wheat in monoculture, due largely to the decrease in *Pantoea* and *Enterobacteria*. The  
317 abundance of *Bacteroidetes*, especially *Pedobacter* and *Flavobacterium*, also increased  
318 between July and October.

319

## 320 **Discussion**

321 Most studies on crop residues have focused on their impact on soil microbial  
322 communities [16], and the rare studies investigating the impact of soil on residue communities  
323 focused exclusively on bacteria [27, 28] or fungi [53]. Most of these studies were conducted  
324 on residues from a single year. Bastian et al. [12] established an extensive description of the  
325 species present in the soil, detritosphere and wheat residues, using sterilised residues and soil  
326 in a microcosm. In this study, we showed, under natural conditions, that three main factors  
327 (plant species, cropping season, rotation) simultaneously influence the composition of both  
328 fungal and bacterial communities present on residues. This study is the first to investigate the  
329 total fungal and bacterial communities associated with wheat and oilseed rape residues by a  
330 metabarcoding approach over two consecutive years. The very low variability of the  
331 communities for the five replicates is remarkable and shows that our strategy would be  
332 appropriate for comparing the effects of different treatments on microbial communities.

333

334 **Crop residues should be viewed as a shifting platform for microbial meeting**  
335 **strongly affected by plant species**

336 Oilseed rape and wheat residues contained different sets of micro-organisms before  
337 soil contact and during the firsts sampling dates after harvest. Similar results were previously  
338 obtained for the bacterial communities of buried crop residues [28]. Consistent with the  
339 findings of this previous study, the divergence between wheat and oilseed rape bacterial  
340 communities was probably due to differences in the chemical compounds present in the  
341 plants. The rapid change in the community observed at early stages of residue degradation for  
342 oilseed rape may be explained by the modification of simple compounds (sugars, starch, etc.),  
343 whereas wheat is composed of more complex compounds (lignin) and is, therefore, broken  
344 down less quickly, resulting in a slower change in the microbial community [28]. Overall, the  
345 change in bacterial community composition highlights turnover between copiotrophs and  
346 oligotrophs. Although copiotrophy and oligotrophy are physiological traits, several attempts  
347 have been made to classify microorganisms as oligotrophs and copiotrophs based on  
348 phylogeny [54]. According to this generalization, bacterial and fungal taxa whose relative  
349 abundances are significantly decreased during succession belong mainly to copiotroph. These  
350 taxa include for instance *Alternaria*, *Cladosporium*, *Massilia* and *Pseudomonas* (Additional  
351 file: Fig. S5). In contrast, the relative abundances of oligotrophic taxa such as *Coprinellus* or  
352 *Nocardiodes* increased during residues degradation, which could be indicative of the superior  
353 abilities of these micro-organisms to degrade complex polymers.

354 The initial fungal communities were structured mostly by the presence of species  
355 originating from the plant, several of which were highly specialised on the host plant. These  
356 species were gradually replaced by more generalist species, which colonised the residues of  
357 both plants. Most of these generalists, such as *Exophiala*, *Coprinellus* and *Torula*, are known  
358 to be soil-born [55, 56], or involved in degradation, such as *Coprionopsis* [57]. The host-

359 specific fungi identified in our study included a large number of ascomycetes known to be  
360 foliar pathogens (*O. yallundae*, *Fusarium* sp. and *Gibberella* sp., *Z. tritici*, *P. tritici-repentis*,  
361 *Parastagonospora nodorum*, *Monographella nivalis*, *L. biglobosa* and *L. maculans*). The  
362 lifestyles of some pathogens are well-documented, as for *Z. tritici*, *P. tritici-repentis* and *L.*  
363 *maculans*. The decrease with time in levels of *Z. tritici* and other pathogens in wheat residues  
364 contrasts with the persistence of *L. maculans* and *L. biglobosa* in oilseed rape residues. These  
365 three pathogens are all known to reproduce sexually on the residues of their host plant [31,  
366 58], but the life cycle of *L. maculans* is characterised by systemic host colonisation through  
367 intracellular growth in xylem vessels [59], whereas the development of *Z. tritici* is localised  
368 and exclusively extracellular [60]. Oilseed rape residues thus provide *L. maculans* with  
369 greater protection than is provided to *Z. tritici* by wheat residues. This likely explains  
370 differences in the persistence of the two pathogens and in the temporal dynamics of ascospore  
371 release: over up to two years for *L. maculans* [61, 62] but only a few months for *Z. tritici* [31,  
372 63]. The predominance of *L. maculans* on oilseed rape residues was not surprising given that  
373 the oilseed rape cultivar Alpaga is known to be susceptible to *L. maculans*, but the high  
374 abundance of *L. biglobosa* was much more remarkable. One surprising finding of our study  
375 was the constant association of *L. maculans* with *L. biglobosa* on residues. Indeed, *L.*  
376 *biglobosa* is known to be more associated with upper-stem lesions [64], and its presence in  
377 large amounts on residues has never before been reported.

378         Our findings are consistent with current epidemiological knowledge of emblematic  
379 wheat and oilseed rape diseases, but they highlight our lack of knowledge concerning the  
380 lifestyles of many other fungal pathogens present on residues. A key point to be taken into  
381 account is that the trophic status of many species known to be principally pathogenic or non-  
382 pathogenic is not definitive [65]. For instance, *Alternaria infectoria* is sometimes described as  
383 a pathogen of wheat [13, 66], sometimes as an endophyte [67], and has even been tested as a



384 potential biocontrol agent against *Fusarium pseudograminearum* on wheat [68]. Crop  
385 residues, half-plant/half-soil, should be the focus of future studies aiming to disentangle the  
386 succession of microbial species with different lifestyles and to characterise their relative  
387 impacts on the development of currently minor, but potentially threatening diseases.

388

389 **The residue microbiota should be analysed in a dynamic manner, both within and**  
390 **between years**

391 The results of our study highlight the importance of conducting multi-year studies  
392 focusing on ecological dynamics both within and between years in natural conditions. Year  
393 had a strong effect on both bacterial and fungal communities. Fluctuations of climatic  
394 conditions (temperature, rainfall, wind) have a major impact on pathogenesis (disease triangle  
395 concept [69]) and on the saprophytic survival of plant pathogens during interepidemic periods  
396 [70]. The two years of our study were marked by similar means of 10-day mean temperatures,  
397 but large differences in rainfall: mean 10-day cumulative rainfall in the first year was almost  
398 twice that in the second (Additional file 1: Table S7). The colonisation of residues by late  
399 colonisers may be affected by such climatic differences: in wheat, most prevalent degrading  
400 fungi (like *Coprinellus*, *Psathyrella*, *Coprinopsis*) were almost absent in the second year of  
401 the study. There was also considerable dissimilarity between the bacterial communities  
402 associated with each of the two years. For example, genus *Enterobacter*, which was highly  
403 abundant in the second year, was barely detectable in the first year.

404

405 **Crop rotation has little impact on residue microbial communities**

406 Oilseed rape is never grown in monoculture, so the effect of crop rotation was assessed  
407 only for wheat. The effect of rotation on residue microbial communities was much smaller  
408 than the effect of year (cropping season). It was more marked for fungi, for which diversity

409 was greater in monoculture than in rotation. The use of a rotation may prevent the most  
410 strongly specialised species, in this case fungi, from becoming established, regardless of their  
411 pathogenicity. This finding is consistent with the greater development of some diseases in  
412 monoculture conditions, which promote the maintenance of pathogens through the local  
413 presence of primary inoculum. For instance, the presence of *P. tritici-repentis*, agent of tan  
414 spot disease, in the wheat monoculture plot and its absence from wheat-oilseed rape plots is  
415 consistent with epidemiological knowledge indicating that this disease can be controlled by  
416 leaving a sufficient interval between consecutive wheat crops in the same field [71].

417

418 **Lesson to be learned from the residue microbial communities for the sustainable**  
419 **management of debris-borne diseases: a delicate balance between pathogenic and**  
420 **beneficial micro-organisms**

421 The maintenance of crop residues at the surface of the cultivated soil increases the  
422 microbial diversity of the soil and, in some ways, helps to maintain good functional  
423 homeostasis [72]. However, conservation practices tend to increase the risk of foliar diseases  
424 [4–6]. Most disease management strategies focus on epidemic periods, during which the  
425 pathogen and its host are in direct contact. Interepidemic periods are also crucial for pathogen  
426 development, although during these periods the primary inoculum is not directly in contact  
427 with the new crop whilst not present in the field. Indeed, by carrying the sexual reproduction  
428 of several fungal pathogens, residues contribute to the generation and transmission of new  
429 virulent isolates potentially overcoming resistance genes, during monocyclic epidemics, as  
430 described for oilseed rape canker caused by *L. maculans* [73], but also polycyclic epidemics,  
431 as described for Septoria tritici blotch caused by *Z. tritici* [74].

432 However, the results of our study suggest that residues should not only be considered as  
433 a substrate for pathogens and a potential source of inoculum. Indeed, we detected several

434 fungi identified as beneficial or even biocontrol agents in previous studies, such as  
435 *Clonostachys rosea*, *Aureobasidium pullulans*, *Chaetomium globosum* and *Cryptococcus* spp..  
436 *C. rosea*, which was detected in both oilseed rape and wheat residues, has been reported to  
437 limit the sexual and asexual reproduction of *Didymella rabiei* on chickpea residues by  
438 mycoparasitism [75]. It has also been reported to be effective against *Fusarium culmorum* on  
439 wheat plants, through antibiosis during the epidemic period [76], and on wheat residues,  
440 through antagonism during the interepidemic period [77]. *Cladosporium* spp., which were  
441 abundant in our study, have also been reported to inhibit the development of *P. tritici-repentis*  
442 on wheat plants [78] and of *Fusarium* spp. on wheat residues [77]. The presence of these  
443 fungal species on wheat and oilseed rape residues is of potential interest for future analyses of  
444 interactions. Due to the use of a low-resolution marker for bacterial characterisation, we were  
445 unable to identify similarly the bacteria potentially interacting with pathogenic fungi. For  
446 instance, the presence of *Pseudomonas* spp. suggests possible interactions both with other  
447 microbial species and with the host plant [79], but the nature of the potential interactions is  
448 indeterminate: species of the *Pseudomonas fluorescens* group are known to be beneficial to  
449 plants, whereas *Pseudomonas syringae* and *Pseudomonas aeruginosa* are known to be  
450 pathogens of plants and even humans.

451         Although our study reveals the presence of genera or species reported in the literature as  
452 biocontrol agents, it has not yet shown any interaction between them and the pathogens. This  
453 experimental study (sampling effort, residue treatments, etc.) was not designed to characterize  
454 such interactions. A strategy involving the inference of microbial interaction networks from  
455 metabarcoding datasets might help to identify the species beneficial against pathogens,  
456 through competition, antagonism or parasitism. This however requires a more analytical,  
457 comparative experimental approach, that goes beyond the only description of shifts in natural  
458 communities composition: for example, using different “treatments” in a broad sense (e.g.

459 artificial inoculation with a species or a group of species, change of biotic or abiotic  
460 environmental conditions, etc.) in order to modify interaction networks and so highlight the  
461 impact of some groups of micro-organisms on the whole community or a given species.

462

## 463 **Conclusion**

464 This study shows that crop residues, which can be seen as half-plant/half-soil transient  
465 compartment, constitute a pivotal fully-fledged microbial ecosystem that has received much  
466 less attention than the phyllosphere and rhizosphere to date. This study therefore fills a gap in  
467 knowledge of the communities present on crop residues under natural conditions. It confirms  
468 that the microbiote of crop residues should be taken into account in the management of  
469 residue-borne diseases. Taking into account this ecosystem is essential, not only to improve  
470 the quantitative management of crop residues, but also to identify groups of beneficial micro-  
471 organisms naturally present. The beneficial elements of the microbial community should be  
472 preserved, or even selected, characterised and used as biological control agents against the  
473 pathogens that complete their life cycle on the residues. These results are particularly  
474 important in that wheat-oilseed rape rotations are among the most widespread arable cropping  
475 systems in France and Europe.

476

## 477 **Acknowledgements**

478 This study was performed in collaboration with the GeT core facility, Toulouse, France  
479 (<http://get.genotoul.fr>) and was supported by *France Génomique National Infrastructure*,  
480 funded as part of “*Investissement d’avenir*” program managed by *Agence Nationale pour la*  
481 *Recherche* (contract ANR-10-INBS-09). We thank Martial Briand (INRA, UMR IRHS) and  
482 Dr. Gautier Richard (INRA, UMR IGEPP) for assistance with bioinformatic analyses, and Dr.

483 Thierry Rouxel (INRA, UMR BIOGER) for improving and clarifying this manuscript. We  
484 thank Julie Sappa for her help correcting our English.

485

## 486 **Funding**

487 This study was supported by a grant from the European Union Horizon Framework 2020  
488 Program (EMPHASIS Project, Grant Agreement no. 634179) covering the 2015-2019 period.

489

## 490 **Availability of data and materials**

491 The raw sequencing data is available from the European Nucleotide Archive (ENA) under the  
492 study accession PRJEB27255 (Sample SAMEA4723701 to SAMEA4724326). We provide  
493 the command-line script for data analysis and all necessary input files as Additional File 2.

494

## 495 **Authors' contributions**

496 LK, FS, VL, MHB, MB conceived the study, participated in its design, and wrote the  
497 manuscript. LK conducted the experiments and analysed the data. FS and VL supervised the  
498 project. All authors read and approved the final manuscript.

499

## 500 **Ethics approval and consent to participate**

501 Not applicable

502

## 503 **Consent for publication**

504 Not applicable

505

## 506 **Competing interests**

507 The authors declare that they have no competing interests.

508

## 509 **References**

- 510 1. Smil, V. (1999). Crop residues: agriculture's largest harvest crop residues incorporate  
511 more than half of the world's agricultural phytomass. *BioScience* 49, 299–308.
- 512 2. Govaerts, B., Mezzalama, M., Unno, Y., Sayre, K.D., Luna-Guido, M., Vanherck, K.,  
513 Dendooven, L., and Deckers, J. (2007). Influence of tillage, residue management, and  
514 crop rotation on soil microbial biomass and catabolic diversity. *Appl. Soil Ecol.* 37, 18–  
515 30.
- 516 3. Derpsch, R., Friedrich, T., Kassam, A., and Hongwen, L. (2010). Current status of  
517 adoption of no-till farming in the world and some of its main benefits. *Biol Eng* 3, 25.
- 518 4. Bailey, K.L. (1996). Diseases under conservation tillage systems. *Can. J. Plant Sci.* 76,  
519 635–639.
- 520 5. Bailey, K., and Lazarovits, G. (2003). Suppressing soil-borne diseases with residue  
521 management and organic amendments. *Soil Tillage Res.* 72, 169–180.
- 522 6. Bockus, W.W., and Shroyer, J.P. (1998). The impact of reduced tillage on soilborne  
523 plant pathogens. *Annu. Rev. Phytopathol.* 36, 485–500.
- 524 7. Bockus, W.W. (1998). Control strategies for stubble-borne pathogens of wheat. *Can. J.*  
525 *Plant Pathol.* 20, 371–375.
- 526 8. Cook, R.J., Boosalis, M.G., and Doupnik, B. (1978). Influence of crop residues on plant  
527 diseases. *Crop Residue Manag. Syst.* 147–163.
- 528 9. Morais, D., Sache, I., Suffert, F., and Laval, V. (2016). Is the onset of *Septoria tritici*  
529 blotch epidemics related to the local pool of ascospores? *Plant Pathol.* 65, 250–260.
- 530 10. Vayssier-Taussat, M., Albina, E., Citti, C., Cosson, J.-F., Jacques, M.-A., Lebrun, M.-  
531 H., Le Loir, Y., Ogliastro, M., Petit, M.-A., Roumagnac, P., et al. (2014). Shifting the

- 532 paradigm from pathogens to pathobiome: new concepts in the light of meta-omics.  
533 Front. Cell. Infect. Microbiol. 4.
- 534 11. Hadas, A., Kautsky, L., Goek, M., and Erman Kara, E. (2004). Rates of decomposition  
535 of plant residues and available nitrogen in soil, related to residue composition through  
536 simulation of carbon and nitrogen turnover. Soil Biol. Biochem. 36, 255–266.
- 537 12. Bastian, F., Bouziri, L., Nicolardot, B., and Ranjard, L. (2009). Impact of wheat straw  
538 decomposition on successional patterns of soil microbial community structure. Soil  
539 Biol. Biochem. 41, 262–275.
- 540 13. Hertz, M., Jensen, I.R., Jensen, L.Ø., Thomsen, S.N., Winde, J., Dueholm, M.S.,  
541 Sørensen, L.H., Wollenberg, R.D., Sørensen, H.O., Sondergaard, T.E., et al. (2016). The  
542 fungal community changes over time in developing wheat heads. Int. J. Food Microbiol.  
543 222, 30–39.
- 544 14. Qin, Y., Fu, Y., Dong, C., Jia, N., and Liu, H. (2016). Shifts of microbial communities  
545 of wheat (*Triticum aestivum* L.) cultivation in a closed artificial ecosystem. Appl.  
546 Microbiol. Biotechnol. 100, 4085–4095.
- 547 15. Vacher, C., Hampe, A., Porté, A.J., Sauer, U., Compant, S., and Morris, C.E. (2016).  
548 The phyllosphere: microbial jungle at the plant–climate interface. Annu. Rev. Ecol.  
549 Evol. Syst. 47, 1–24.
- 550 16. Bending, G.D., Turner, M.K., and Jones, J.E. (2002). Interactions between crop residue  
551 and soil organic matter quality and the functional diversity of soil microbial  
552 communities. Soil Biol. Biochem. 34, 1073–1082.
- 553 17. Degruene, F., Theodorakopoulos, N., Dufrêne, M., Colinet, G., Bodson, B., Hiel, M.-P.,  
554 Taminiiau, B., Nezer, C., Daube, G., and Vandebol, M. (2016). No favorable effect of  
555 reduced tillage on microbial community diversity in a silty loam soil (Belgium). Agric.  
556 Ecosyst. Environ. 224, 12–21.

- 557 18. Sommermann, L., Geistlinger, J., Wibberg, D., Deubel, A., Zwanzig, J., Babin, D.,  
558 Schlüter, A., and Schellenberg, I. (2018). Fungal community profiles in agricultural  
559 soils of a long-term field trial under different tillage, fertilization and crop rotation  
560 conditions analyzed by high-throughput ITS-amplicon sequencing. *PLoS ONE* *13*,  
561 e0195345.
- 562 19. Zelenev, V.V., van Bruggen, A.H.C., and Semenov, A.M. (2005). Short-term wavelike  
563 dynamics of bacterial populations in response to nutrient input from fresh plant  
564 residues. *Microb. Ecol.* *49*, 83–93.
- 565 20. Poll, C., Brune, T., Begerow, D., and Kandeler, E. (2010). Small-scale diversity and  
566 succession of fungi in the detritosphere of rye residues. *Microb. Ecol.* *59*, 130–140.
- 567 21. Poll, C., Marhan, S., Ingwersen, J., and Kandeler, E. (2008). Dynamics of litter carbon  
568 turnover and microbial abundance in a rye detritosphere. *Soil Biol. Biochem.* *40*, 1306–  
569 1321.
- 570 22. Kuzyakov, Y., and Blagodatskaya, E. (2015). Microbial hotspots and hot moments in  
571 soil: Concept & review. *Soil Biol. Biochem.* *83*, 184–199.
- 572 23. Nicolardot, B., Bouziri, L., Bastian, F., and Ranjard, L. (2007). A microcosm  
573 experiment to evaluate the influence of location and quality of plant residues on residue  
574 decomposition and genetic structure of soil microbial communities. *Soil Biol. Biochem.*  
575 *39*, 1631–1644.
- 576 24. Hilton, S., Bennett, A.J., Chandler, D., Mills, P., and Bending, G.D. (2018). Preceding  
577 crop and seasonal effects influence fungal, bacterial and nematode diversity in wheat  
578 and oilseed rape rhizosphere and soil. *Appl. Soil Ecol.*
- 579 25. AGRESTE, 2018. Données de production Grandes Cultures (national + régions) au  
580 01/02/2018. Excel file,  
581 [http://agreste.agriculture.gouv.fr/IMG/xls/2018\\_017donneesdeptgrandescultures.xls](http://agreste.agriculture.gouv.fr/IMG/xls/2018_017donneesdeptgrandescultures.xls)



- 582 26. AGRESTE, 2008. Un tiers des grandes cultures semées en 2006 sans retournement des  
583 sols. Dans le sillon du non-labour. Agreste Primeur, n°207,  
584 <http://agreste.agriculture.gouv.fr/IMG/pdf/primeur207.pdf>
- 585 27. Pascault, N., Nicolardot, B., Bastian, F., Thiébeau, P., Ranjard, L., and Maron, P.-A.  
586 (2010a). *In situ* dynamics and spatial heterogeneity of soil bacterial communities under  
587 different crop residue management. *Microb. Ecol.* *60*, 291–303.
- 588 28. Pascault, N., Cécillon, L., Mathieu, O., Hénault, C., Sarr, A., Lévêque, J., Farcy, P.,  
589 Ranjard, L., and Maron, P.-A. (2010b). *In situ* dynamics of microbial communities  
590 during decomposition of wheat, rape, and alfalfa residues. *Microb. Ecol.* *60*, 816–828.
- 591 29. Hanson, B.M., and Weinstock, G.M. (2016). The importance of the microbiome in  
592 epidemiologic research. *Ann. Epidemiol.* *26*, 301–305.
- 593 30. Costa Junior, C., Corbeels, M., Bernoux, M., Píccolo, M.C., Siqueira Neto, M., Feigl,  
594 B.J., Cerri, C.E.P., Cerri, C.C., Scopel, E., and Lal, R. (2013). Assessing soil carbon  
595 storage rates under no-tillage: Comparing the synchronic and diachronic approaches.  
596 *Soil Tillage Res.* *134*, 207–212.
- 597 31. Suffert, F., and Satche, I. (2011). Relative importance of different types of inoculum to  
598 the establishment of *Mycosphaerella graminicola* in wheat crops in north-west Europe:  
599 Wheat debris as local source of *M. graminicola* inoculum. *Plant Pathol.* *60*, 878–889.
- 600 32. Morais, D., Laval, V., Satche, I., and Suffert, F. (2015). Comparative pathogenicity of  
601 sexual and asexual spores of *Zymoseptoria tritici* (*Septoria tritici* blotch) on wheat  
602 leaves. *Plant Pathol.* *64*, 1429–1439.
- 603 33. Suffert, F., Goyeau, H., Satche, I., Carpentier, F., Gélisse, S., Morais, D., Delestre G.  
604 (2017) Epidemiological trade-off between intra- and interannual scales in the evolution  
605 of aggressiveness in a local plant pathogen population. *Evol. Appl.* *11*, 768–780.

- 606 34. Buée, M., Reich, M., Murat, C., Morin, E., Nilsson, R.H., Uroz, S., and Martin, F.  
607 (2009). 454 Pyrosequencing analyses of forest soils reveal an unexpectedly high fungal  
608 diversity: Research. *New Phytol.* *184*, 449–456.
- 609 35. Caporaso, J.G., Lauber, C.L., Walters, W.A., Berg-Lyons, D., Lozupone, C.A.,  
610 Turnbaugh, P.J., Fierer, N., and Knight, R. (2011). Global patterns of 16S rRNA  
611 diversity at a depth of millions of sequences per sample. *Proc. Natl. Acad. Sci. USA*  
612 *108*, 4516–4522.
- 613 36. Callahan, B.J., McMurdie, P.J., Rosen, M.J., Han, A.W., Johnson, A.J.A., and Holmes,  
614 S.P. (2016). DADA2: High-resolution sample inference from Illumina amplicon data.  
615 *Nat. Methods* *13*, 581–583.
- 616 37. DADA2 Pipeline Tutorial (1.8). Available at:  
617 <https://benjjneb.github.io/dada2/tutorial.html>. (Accessed: 26th June 2018)
- 618 38. Cole, J.R., Wang, Q., Cardenas, E., Fish, J., Chai, B., Farris, R.J., Kulam-Syed-  
619 Mohideen, A.S., McGarrell, D.M., Marsh, T., Garrity, G.M., et al. (2009). The  
620 Ribosomal Database Project: improved alignments and new tools for rRNA analysis.  
621 *Nucleic Acids Res.* *37*, D141–D145.
- 622 39. Abarenkov, K., Nilsson, R.H., Larsson, K.-H., Alexander, I.J., Eberhardt, U., Erland, S.,  
623 Høiland, K., Kjøller, R., Larsson, E., Pennanen, T., et al. (2010). The UNITE database  
624 for molecular identification of fungi – recent updates and future perspectives. *New*  
625 *Phytol.* *186*, 281–285.
- 626 40. Ficetola, G.F., Pansu, J., Bonin, A., Coissac, E., Giguët-Covex, C., De Barba, M.,  
627 Gielly, L., Lopes, C.M., Boyer, F., Pompanon, F., et al. (2015). Replication levels, false  
628 presences and the estimation of the presence/absence from eDNA metabarcoding data.  
629 *Mol. Ecol. Resour.* *15*, 543–556.

- 630 41. McMurdie, P.J., and Holmes, S. (2014). Waste not, want not: why rarefying  
631 microbiome data is inadmissible. *PLoS Comput Biol* *10*, e1003531.
- 632 42. Kassambara, A. (2017). ggpubr: “ggplot2” Based Publication Ready Plots.
- 633 43. McMurdie, P.J., and Holmes, S. (2013). phyloseq: An R package for reproducible  
634 interactive analysis and graphics of microbiome census data. *PLoS ONE* *8*, e61217.
- 635 44. Oksanen, J., Blanchet, F.G., Friendly, M., Kindt, R., Legendre, P., McGlinn, D.,  
636 Minchin, P.R., O’Hara, R.B., Simpson, G.L., Solymos, P., et al. (2017). vegan:  
637 Community Ecology Package. R package version 2.4-4. [https://CRAN.R-](https://CRAN.R-project.org/package=vegan)  
638 [project.org/package=vegan](https://CRAN.R-project.org/package=vegan).
- 639 45. Baselga, A., and Orme, C.D.L. (2012). betapart: an R package for the study of beta  
640 diversity. *Methods Ecol. Evol.* *3*, 808–812.
- 641 46. Letunic, I., and Bork, P. (2016). Interactive tree of life (iTOL) v3: an online tool for the  
642 display and annotation of phylogenetic and other trees. *Nucleic Acids Res.* *44*, W242–  
643 W245.
- 644 47. Bateman, G.L., and Kwaśna, H. (1999). Effects of number of winter wheat crops grown  
645 successively on fungal communities on wheat roots. *Appl. Soil Ecol.* *13*, 271–282.
- 646 48. Vujanovic, V., Mavragani, D., and Hamel, C. (2012). Fungal communities associated  
647 with durum wheat production system: A characterization by growth stage, plant organ  
648 and preceding crop. *Crop Prot.* *37*, 26–34.
- 649 49. Larran, S., Perelló, A., Simón, M.R., and Moreno, V. (2002). Isolation and analysis of  
650 endophytic microorganisms in wheat (*Triticum aestivum* L.) leaves. *World J. Microbiol.*  
651 *Biotechnol.* *18*, 683–686.
- 652 50. Grudzinska-Sterno, M., Yuen, J., Stenlid, J., and Djurle, A. (2016). Fungal communities  
653 in organically grown winter wheat affected by plant organ and development stage. *Eur.*  
654 *J. Plant Pathol.* *146*, 401–417.

- 655 51. Zhou, L., Hu, Q., Johansson, A., and Dixelius, C. (2006). *Verticillium longisporum* and  
656 *V. dahliae*: infection and disease in *Brassica napus*. *Plant Pathol.* 55, 137–144.
- 657 52. Zhang, Q., Zhang, J., Yang, L., Zhang, L., Jiang, D., Chen, W., and Li, G. (2014).  
658 Diversity and biocontrol potential of endophytic fungi in *Brassica napus*. *Biol. Control*  
659 72, 98–108.
- 660 53. Naseri, B., Davidson, J.A., and Scott, E.S. (2008). Survival of *Leptosphaeria maculans*  
661 and associated mycobiota on oilseed rape stubble buried in soil. *Plant Pathol.* 57, 280–  
662 289.
- 663 54. Ho, A., Di Lonardo, D.P., and Bodelier, P.L.E. (2017). Revisiting life strategy concepts  
664 in environmental microbial ecology. *FEMS Microbiol Ecol.* 93,  
665 doi:10.1093/femsec/fix006.
- 666 55. Gorfer, M., Blumhoff, M., Klaubauf, S., Urban, A., Inselsbacher, E., Bandian, D.,  
667 Mitter, B., Sessitsch, A., Wanek, W., and Strauss, J. (2011). Community profiling and  
668 gene expression of fungal assimilatory nitrate reductases in agricultural soil. *ISME J.* 5,  
669 1771–1783.
- 670 56. Swer, H., Dkhar, M.S., and Kayang, H. (2011). Fungal population and diversity in  
671 organically amended agricultural soils of Meghalaya, India. *J. Org. Syst.* 6, 3–12.
- 672 57. Turbe-Doan, A., Arfi, Y., Record, E., Estrada-Alvarado, I., and Levasseur, A. (2013).  
673 Heterologous production of cellobiose dehydrogenases from the basidiomycete  
674 *Coprinopsis cinerea* and the ascomycete *Podospora anserina* and their effect on  
675 saccharification of wheat straw. *Appl. Microbiol. Biotechnol.* 97, 4873–4885.
- 676 58. Rouxel, T., and Balesdent, M.H. (2005). The stem canker (blackleg) fungus,  
677 *Leptosphaeria maculans*, enters the genomic era. *Mol. Plant Pathol.* 6, 225–241.
- 678 59. Hammond, K.E., Lewis, B.G., and Musa, T.M. (1985). A systemic pathway in the  
679 infection of oilseed rape plants by *Leptosphaeria maculans*. *Plant Pathol.* 34, 557–565.

- 680 60. Ponomarenko A., S.B. Goodwin, and G.H.J. Kema. 2011. Septoria tritici blotch (STB)  
681 of wheat. *Plant Health Instructor*. DOI:10.1094/PHI-I-2011-0407-01
- 682 61. Hershman, D.E. (1995). Etiology of canola blackleg in Kentucky and seasonal  
683 discharge patterns of *Leptosphaeria maculans* ascospores from infested canola stubble.  
684 *Plant Dis.* v. 79, 1225–1229.
- 685 62. Petrie, G.A. (Agriculture and A.-F.C. (1995). Patterns of ascospore discharge by  
686 *Leptosphaeria maculans* (blackleg) from 9- to 13-month-old naturally-infected  
687 rapeseed/canola stubble from 1977 to 1993 in Saskatchewan. *Can. Plant Dis. Surv. Can.*
- 688 63. Eyal, Z., Scharen, A.L., Prescott, J.M., and Ginkel, M.V. (1987). The septoria diseases  
689 of wheat : concepts and methods of disease management (CIMMYT).
- 690 64. Fitt, B.D.L., Brun, H., Barbetti, M.J., and Rimmer, S.R. (2006). World-wide importance  
691 of phoma stem canker (*Leptosphaeria maculans* and *L. biglobosa*) on oilseed rape  
692 (*Brassica napus*). *Eur. J. Plant Pathol.* 114, 3–15.
- 693 65. Fesel, P.H., and Zuccaro, A. (2016). Dissecting endophytic lifestyle along the  
694 parasitism/mutualism continuum in *Arabidopsis*. *Curr. Opin. Microbiol.* 32, 103–112.
- 695 66. Nicolaisen, M., Justesen, A.F., Knorr, K., Wang, J., and Pinnschmidt, H.O. (2014).  
696 Fungal communities in wheat grain show significant co-existence patterns among  
697 species. *Fungal Ecol.* 11, 145–153.
- 698 67. Larran, S., Perelló, A., Simón, M.R., and Moreno, V. (2007). The endophytic fungi  
699 from wheat (*Triticum aestivum* L.). *World J. Microbiol. Biotechnol.* 23, 565–572.
- 700 68. Lakhesar, D.P.S., Backhouse, D., and Kristiansen, P. (2010). Nutritional constraints on  
701 displacement of *Fusarium pseudograminearum* from cereal straw by antagonists. *Biol.*  
702 *Control* 55, 241–247.

- 703 69. Brader, G., Compant, S., Vescio, K., Mitter, B., Trognitz, F., Ma, L.-J., and Sessitsch,  
704 A. (2017). Ecology and genomic insights into plant-pathogenic and plant-nonpathogenic  
705 endophytes. *Annu. Rev. Phytopathol.* 55, 61–83.
- 706 70. Leplat, J., Friberg, H., Abid, M., and Steinberg, C. (2013). Survival of *Fusarium*  
707 *graminearum*, the causal agent of *Fusarium* head blight. A review. *Agron. Sustain. Dev.*  
708 33, 97–111.
- 709 71. Bockus, W.W., and Claassen, M.M. (1992). Effects of crop rotation and residue  
710 management practices on severity of tan spot of winter wheat. *Plant Dis.* 76, 633–636.
- 711 72. Van Bruggen, A.H.C., and Semenov, A.M. (2000). In search of biological indicators for  
712 soil health and disease suppression. *Appl. Soil Ecol.* 15, 13–24.
- 713 73. Daverdin, G., Rouxel, T., Gout, L., Aubertot, J.-N., Fudal, I., Meyer, M., Parlange, F.,  
714 Carpezat, J., and Balesdent, M.-H. (2012). Genome structure and reproductive  
715 behaviour influence the evolutionary potential of a fungal phytopathogen. *PLoS Pathog.*  
716 8, e1003020.
- 717 74. Kema, G.H.J., Mirzadi Gohari, A., Aouini, L., Gibriel, H.A.Y., Ware, S.B., van den  
718 Bosch, F., Manning-Smith, R., Alonso-Chavez, V., Helps, J., Ben M'Barek, S., et al.  
719 (2018). Stress and sexual reproduction affect the dynamics of the wheat pathogen  
720 effector AvrStb6 and strobilurin resistance. *Nat. Genet.* 50, 375–380.
- 721 75. Dugan, F.M., Lupien, S.L., Hernandez-Bello, M., Peever, T.L., and Chen, W. (2005).  
722 Fungi resident in chickpea debris and their suppression of growth and reproduction of  
723 *Didymella rabiei* under laboratory conditions. *J. Phytopathol.* 153, 431–439.
- 724 76. Hue, A.G., Voldeng, H.D., Savard, M.E., Fedak, G., Tian, X., and Hsiang, T. (2009).  
725 Biological control of fusarium head blight of wheat with *Clonostachys rosea* strain  
726 ACM941. *Can. J. Plant Pathol.* 31, 169–179.

- 727 77. Luongo, L., Galli, M., Corazza, L., Meekes, E., Haas, L.D., Van Der Plas, C.L., and  
728 Köhl, J. (2005). Potential of fungal antagonists for biocontrol of *Fusarium spp.* in wheat  
729 and maize through competition in crop debris. *Biocontrol Sci. Technol.* *15*, 229–242.
- 730 78. Li, B.C., and Sutton, J.C. (1995). Evaluation of leaf-associated microorganisms for  
731 biocontrol of tan spot in wheat foliage. *Fitopatol. Bras.* *20*, 545–552.
- 732 79. Silby, M.W., Winstanley, C., Godfrey, S.A.C., Levy, S.B., and Jackson, R.W. (2011).  
733 *Pseudomonas* genomes: diverse and adaptable. *FEMS Microbiol. Rev.* *35*, 652–680.

734 **Tables**

735

736 **Table 1** - Results of the PERMANOVA test analysing the effects of plant, rotation, cropping season,  
 737 and sampling period on the fungal and bacterial communities present in oilseed rape and wheat  
 738 residues

| Data set          | Factors                | Fungi          |                 | Bacteria       |                 |
|-------------------|------------------------|----------------|-----------------|----------------|-----------------|
|                   |                        | R <sup>2</sup> | <i>p</i> -value | R <sup>2</sup> | <i>p</i> -value |
| Overall           | Plant <sup>1</sup>     | 0.324          | <0.001          | 0.227          | <0.001          |
|                   | Replicate <sup>2</sup> | 0.016          | 1               | 0.011          | 1               |
|                   | Cropping season        | 0.125          | <0.001          | 0.164          | <0.001          |
|                   | Sampling period        | 0.072          | 0.002           | 0.172          | <0.001          |
| 2015-2016 samples | Plant <sup>1</sup>     | 0.422          | <0.001          | 0.368          | <0.001          |
|                   | Sampling period        | 0.099          | 0.021           | 0.186          | <0.001          |
| 2016-2017 samples | Plant <sup>1</sup>     | 0.418          | <0.001          | 0.300          | <0.001          |
|                   | Sampling period        | 0.118          | 0.009           | 0.241          | <0.001          |
| July 2017 samples | Plant <sup>1</sup>     | 0.755          | 0.004           | 0.696          | <0.001          |
| Wheat samples     | Crop within a rotation | 0.105          | <0.001          | 0.066          | <0.001          |
|                   | Cropping season        | 0.334          | <0.001          | 0.328          | <0.001          |

739 <sup>1</sup> comparison between oilseed rape and wheat, regardless of the rotation.

740 <sup>2</sup> five sampling points per plot.



741 **Figures**

742

743 **Figure 1** - Experimental layout of the experiment. (A) Plots (WWW, WOW and OWO) used  
 744 during the two years of the experiment at the INRA Grignon experimental station (Yvelines,  
 745 France). WWW: plot cropped with winter wheat since 2007. WOW and OWO: plots cropped with  
 746 with a wheat-oilseed rape rotation since 2014. Wheat straw and oilseed rape debris were  
 747 chopped at harvest and left on the soil surface. The dashed line indicates the sampling  
 748 transect. (B) Oilseed rape residues in a plot cropped with wheat (OWO or WOW). (C) Wheat  
 749 residues in a plot cropped with oilseed rape (WOW or OWO). (D) Wheat residues in the  
 750 wheat monoculture crop (WWW).

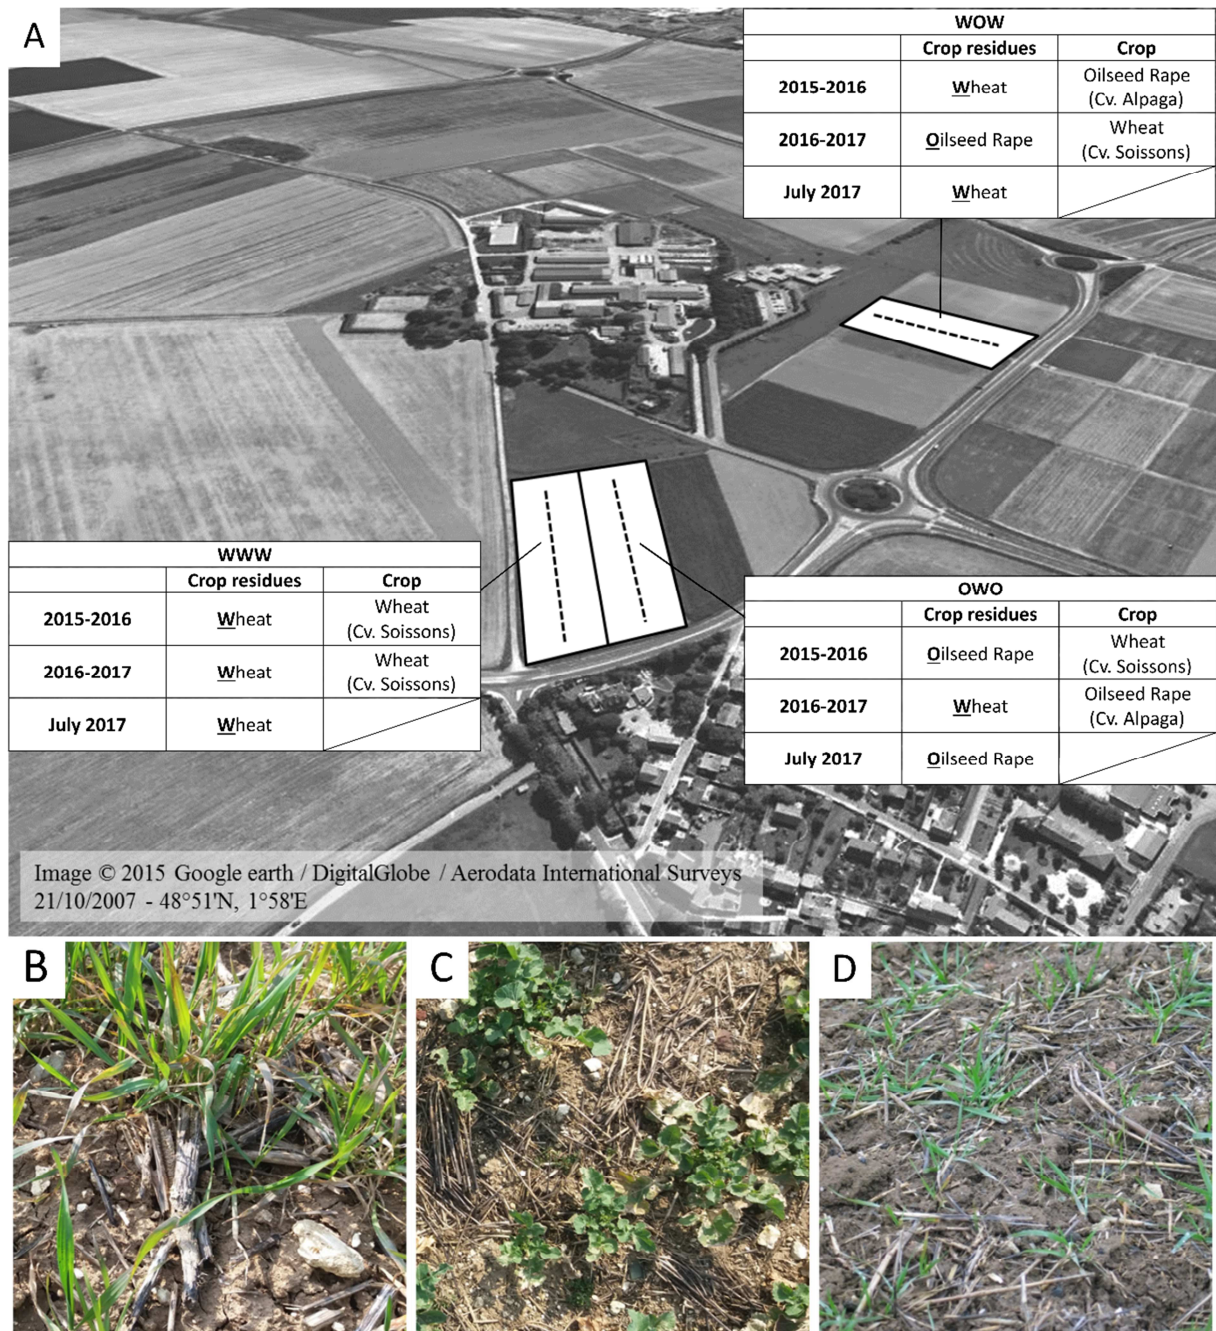

751

752 **Figure 2** - Fungal (A) and bacterial (B) diversity in plants (July) and residues (October, December, February, May), as assessed with the Shannon index, according to sampling  
 753 period, the crop within a rotation (oilseed rape in OWO or WOW, wheat in WWW, wheat in  
 754 WOW or OWO) and the cropping season (2015-2016, 2016-2017). Each box represents the  
 755 distribution of Shannon index for five sampling points. Kruskal-Wallis tests were performed  
 756 for each “crop within a rotation \* cropping season” combination (*p*-values are given under  
 757 each graph). Wilcoxon tests between sampling periods were performed when the Kruskal-  
 758 Wallis test revealed significant differences. Samples not sharing letters are significantly  
 759 different.  
 760

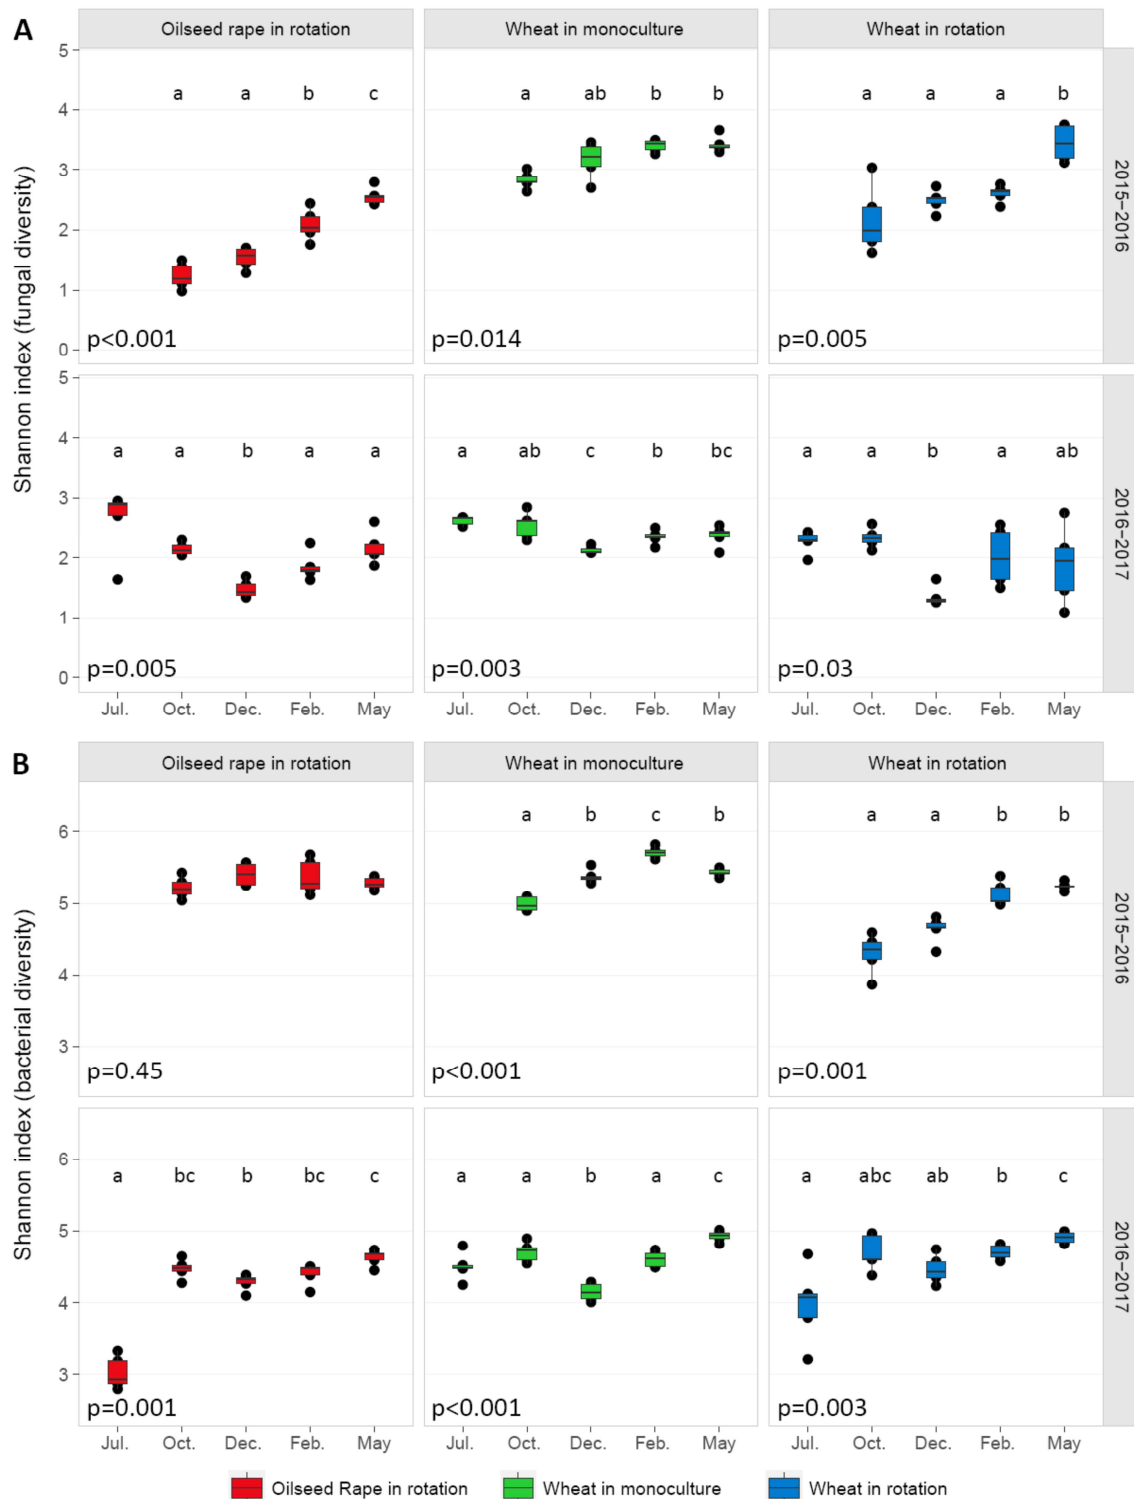

761

762 **Figure 3** - Structure of the fungal (A) and bacterial (B) communities present in oilseed rape  
763 and wheat residues, according to compositional dissimilarity (Bray-Curtis distance), after  
764 multidimensional scaling (MDS). The two MDS were performed on the overall dataset and  
765 faceted according to the sampling period. Each point represents one sample corresponding to  
766 a cropping season (shape: 2015-2016; 2016-2017; 2017-2018) and crop within a rotation  
767 (colour: oilseed rape in rotation, i.e. in WOW and OWO; wheat monoculture, i.e. in WWW;  
768 wheat in rotation, i.e. in WOW and OWO).

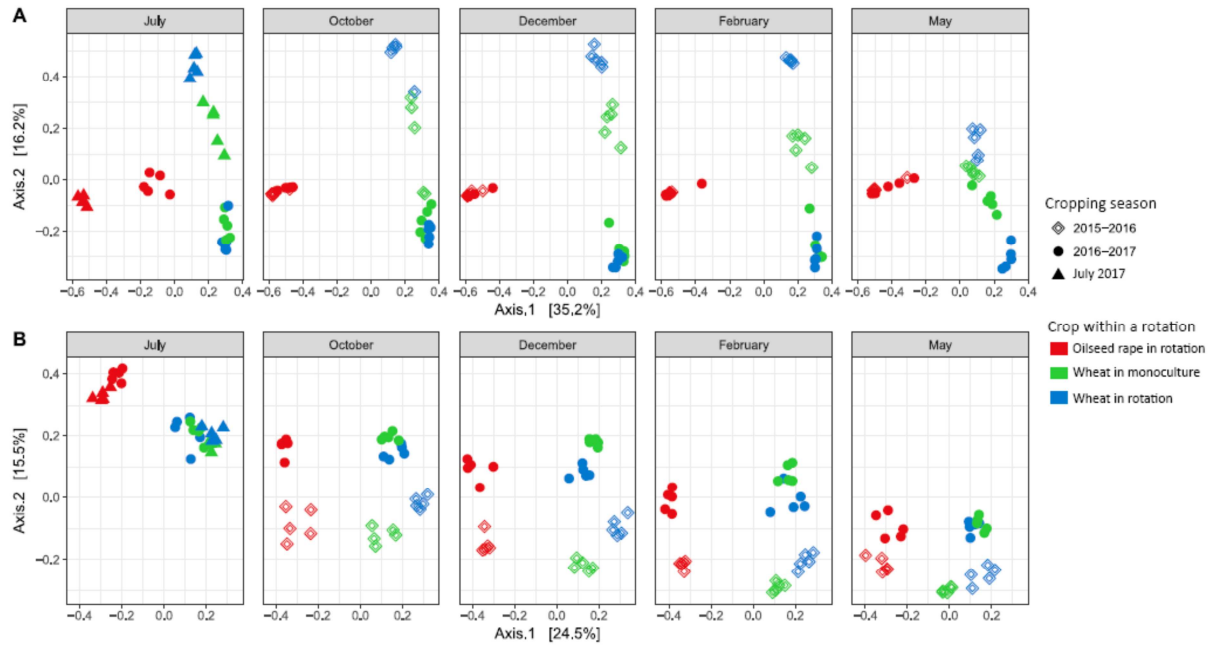

769

770 **Figure 4** - Distribution of the most prevalent fungal genera detected in wheat residues. (A)  
 771 Cladogram of the most prevalent genera. Genera were filtered according to their occurrence  
 772 (at least three times in the five sampling points for each “crop within a rotation \* cropping  
 773 season \* sampling period” combination). Unclassified genera were removed from the tree. (B)  
 774 Number of ASV of each genus. (C) Occurrence of each ASV in the 100 samples of wheat  
 775 residues. (D) Percentage of reads for each genus. (E) Distribution of each genus in the five  
 776 samples per date (increasing number of reads shown on a scale running from yellow to red).

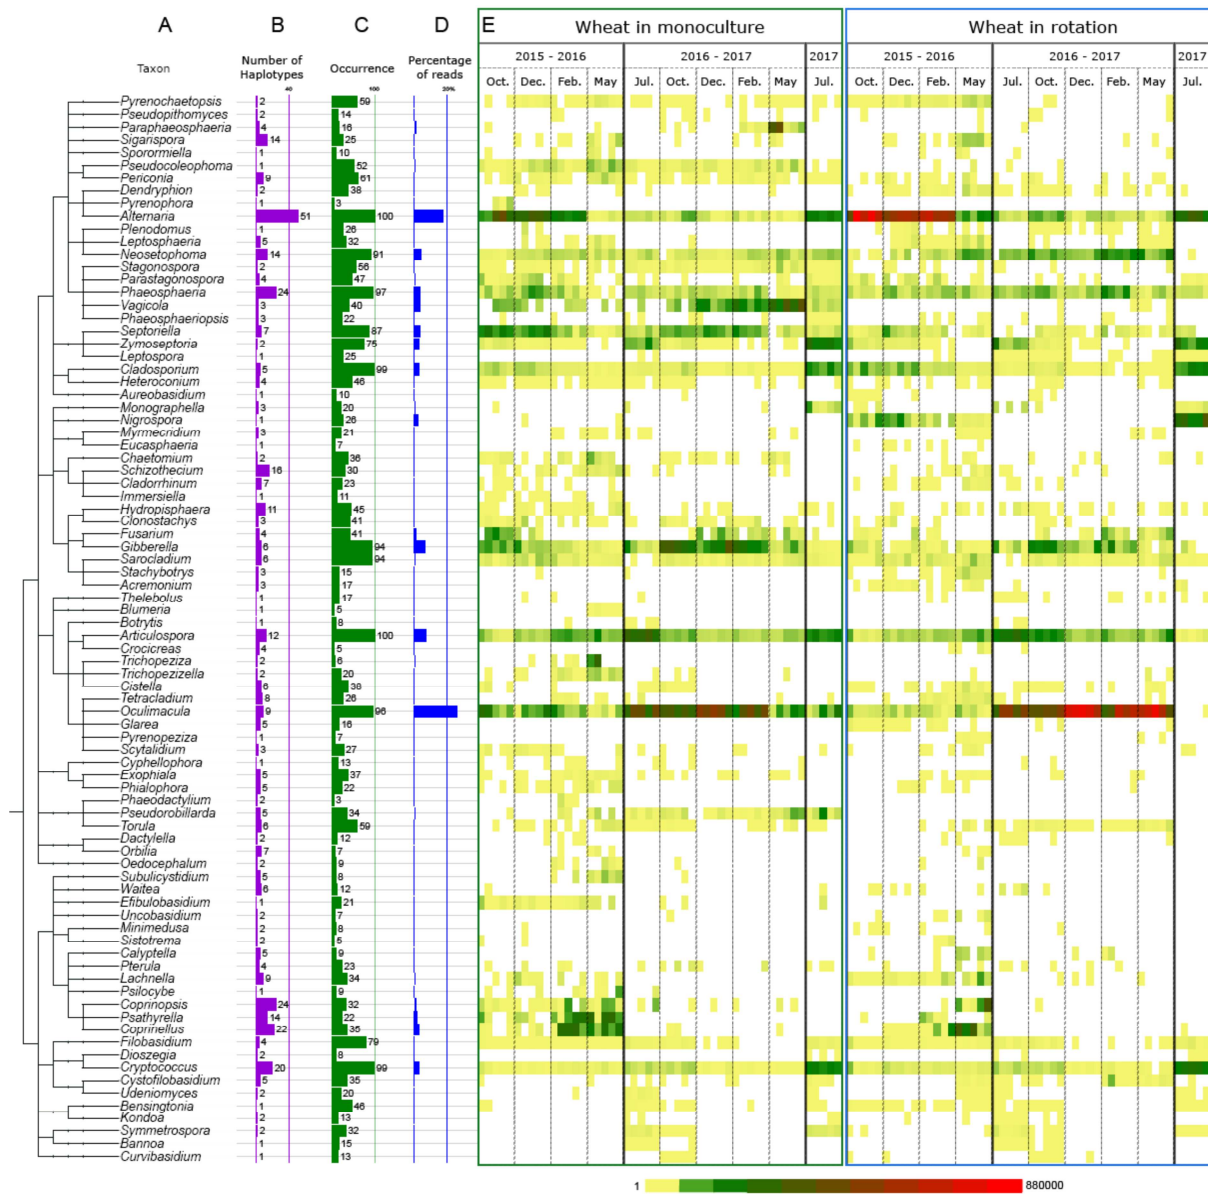

777

778 **Figure 5** - Distribution of the most prevalent fungal genera detected in oilseed rape residues.  
 779 (A) Cladogram of the most prevalent genera. Genera were filtered according to their  
 780 occurrence (at least three times in the five sampling points for each “crop within a rotation \*  
 781 cropping season \* sampling period”) combination. Unclassified genera were removed from  
 782 the tree. (B) Number of ASV for each genus. (C) Occurrence of each ASV in the 50 samples  
 783 of oilseed rape residues. (D) Percentage of reads for each genus. (E) Distribution of each  
 784 genus in the five samples per date (increasing number of reads shown on a scale from yellow  
 785 to red).

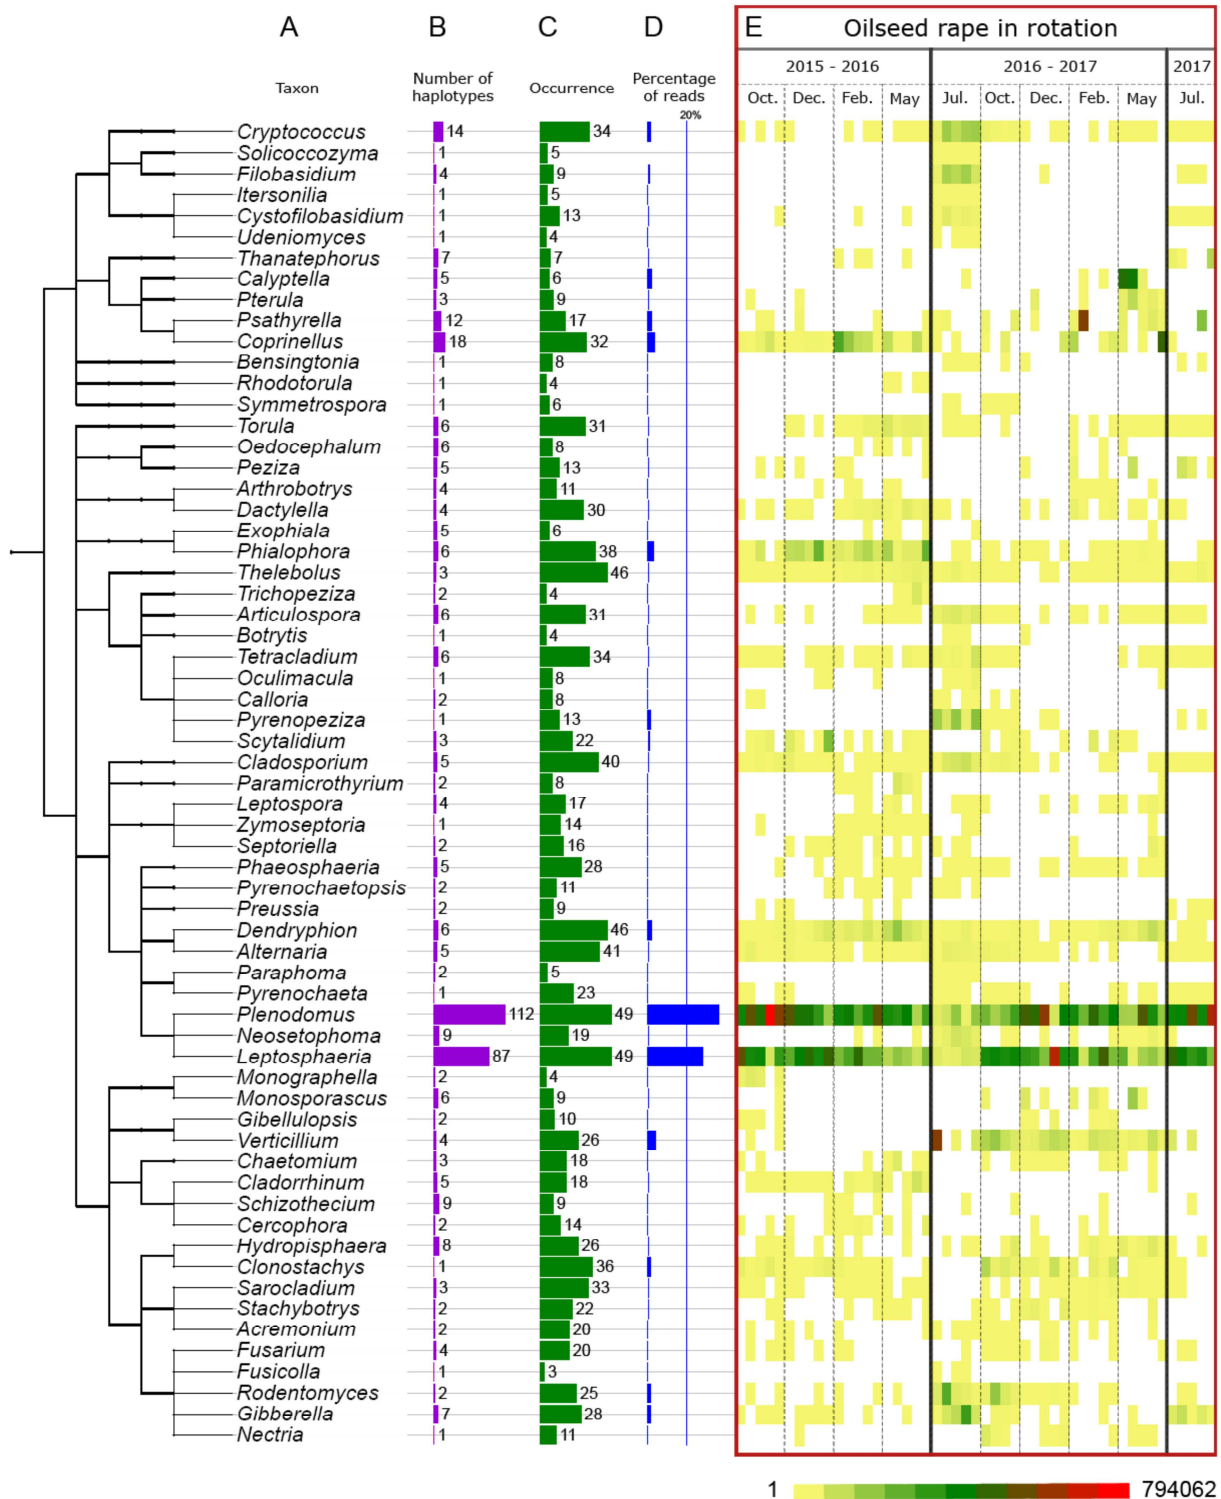

786

1 794062

## Additional files

**Table S1** - Soil texture of the three plots (WWW, OWO and WOW).

|          | WWW, OWO | WOW  |
|----------|----------|------|
| Clay (%) | 27.4     | 18.2 |
| Silt (%) | 53.2     | 61.2 |
| Sand (%) | 18.8     | 20.4 |

**Table S2** - Sampling dates of wheat and oilseed rape plants (July) and residues (October, December, February and May) for each cropping season.

| Cropping season | July       | October    | December   | February   | May        |
|-----------------|------------|------------|------------|------------|------------|
| 2015-2016       | /          | 23.10.2015 | 04.12.2015 | 26.02.2016 | 19.05.2016 |
| 2016-2017       | 11.07.2016 | 17.10.2016 | 05.12.2016 | 06.02.2016 | 15.05.2017 |
| 2017-2018       | 07.07.2017 | /          | /          | /          | /          |

**Table S3** - Total number of reads and percentage (in brackets) remaining after ASV filtering.

|                      | After DADA2 | After replicate suppression | After taxon suppression |
|----------------------|-------------|-----------------------------|-------------------------|
| Bacterial reads      | 14,287,970  | 13,509,461 (94.6%)          | 13,228,976 (92.6%)      |
| Fungal reads         | 9,898,487   | 9,753,628 (98.5%)           | 9,628,995 (97.3%)       |
| Bacterial haplotypes | 19,235      | 2,905                       | 2,726                   |
| Fungal haplotypes    | 3,587       | 1,241                       | 1,189                   |

**Table S4** - *P*-values from Wilcoxon pairwise test comparisons for bacterial and fungal diversity. The *p*-values were calculated from the Shannon index between crops within a rotation (wheat in monoculture, i.e. in WWW; wheat in rotation, i.e. in WOW or OWO; oilseed rape in rotation, i.e. in OWO or WOW) or between crops whatever the rotation (wheat; oilseed rape) for each year. Pairwise tests were performed for all sampling periods in each cropping season (20 samples for each crop within a rotation in 2015- 2016; 25 in 2016-2017; 5 in July 2017). Significant *p*-values are underlined.

| Pairwise comparisons |                                        | 2015-2016        | 2016-2017        | July 2017    |
|----------------------|----------------------------------------|------------------|------------------|--------------|
| Bacterial diversity  | Wheat (monoculture) – Wheat (rotation) | <u>&lt;0.001</u> | 0.801            | <u>0.012</u> |
|                      | Wheat (rotation) – Oilseed rape        | <u>&lt;0.001</u> | <u>0.004</u>     | <u>0.037</u> |
|                      | Wheat (monoculture) – Oilseed rape     | 0.297            | <u>0.004</u>     | <u>0.037</u> |
|                      | Wheat – Oilseed rape                   | 0.1              | <u>&lt;0.001</u> | 1            |
| Fungal diversity     | Wheat (monoculture) – Wheat (rotation) | <u>0.001</u>     | <u>0.0018</u>    | <u>0.012</u> |
|                      | Wheat (rotation) – Oilseed rape        | <u>&lt;0.001</u> | 0.849            | <u>0.012</u> |
|                      | Wheat (monoculture) – Oilseed rape     | <u>&lt;0.001</u> | <u>0.002</u>     | <u>0.012</u> |
|                      | Wheat – Oilseed Rape                   | <u>&lt;0.001</u> | 0.095            | <u>0.03</u>  |

**Table S5** - Summary of meteorological data (temperature, rainfall) for the INRA Grignon experimental station (Yvelines, France), obtained from the CLIMATIK INRA database ([https://intranet.inra.fr/climatik\\_v2/](https://intranet.inra.fr/climatik_v2/)) from July 1<sup>st</sup> to May 31<sup>st</sup> of the following year, for the cropping seasons 2015-2016 and 2016-2017.

|         | 10-day mean temperature (°C) |           | 10-day cumulative rainfall (mm) |           |
|---------|------------------------------|-----------|---------------------------------|-----------|
|         | 2015-2016                    | 2016-2017 | 2015-2016                       | 2016-2017 |
| Mean    | 11.2                         | 10.8      | 22.6                            | 12.3      |
| Minimum | 2.0                          | 0.9       | 0                               | 0         |
| Maximum | 21.8                         | 21.4      | 131                             | 55        |

**Table S6** - Plant effect (wheat vs. oilseed rape) on community dispersion. This effect was tested by applying the Adonis function of the vegan R package to the Bray-Curtis dissimilarity index. *P*-values (not shown) were all < 0.02.

|          | Fungi |           |           |       | Bacteria |           |           |       |
|----------|-------|-----------|-----------|-------|----------|-----------|-----------|-------|
|          | All   | 2015-2016 | 2016-2017 | 2017  | All      | 2015-2016 | 2016-2017 | 2017  |
| July     | 0.372 | /         | 0.611     | 0.755 | 0.423    | /         | 0.540     | 0.696 |
| October  | 0.495 | 0.612     | 0.755     | /     | 0.367    | 0.520     | 0.659     | /     |
| December | 0.486 | 0.688     | 0.691     | /     | 0.370    | 0.573     | 0.641     | /     |
| February | 0.429 | 0.541     | 0.651     | /     | 0.409    | 0.643     | 0.611     | /     |
| May      | 0.273 | 0.337     | 0.401     | /     | 0.315    | 0.435     | 0.508     | /     |



**Table S7** - Decomposition of dissimilarity due to temporal changes in fungal (F) and bacterial (B) community composition. Total dissimilarity is broken down into turnover (replacement of ASV) and nestedness (gain or loss of ASV).

| Crop within a rotation | Season    | Sampling period compared | Total dissimilarity |       | Turnover |       | Nestedness |       |
|------------------------|-----------|--------------------------|---------------------|-------|----------|-------|------------|-------|
|                        |           |                          | F                   | B     | F        | B     | F          | B     |
| Oilseed rape           | 2015-2016 | Oct. - Dec.              | 0.622               | 0.318 | 0.618    | 0.219 | 0.005      | 0.099 |
| Oilseed rape           | 2015-2016 | Dec. - Feb.              | 0.650               | 0.321 | 0.577    | 0.290 | 0.073      | 0.031 |
| Oilseed rape           | 2015-2016 | Feb. - May               | 0.591               | 0.390 | 0.565    | 0.202 | 0.027      | 0.188 |
| Oilseed rape           | 2016-2017 | Jul. - Oct.              | 0.652               | 0.554 | 0.648    | 0.250 | 0.004      | 0.304 |
| Oilseed rape           | 2016-2017 | Oct. - Dec.              | 0.620               | 0.353 | 0.549    | 0.217 | 0.071      | 0.136 |
| Oilseed rape           | 2016-2017 | Dec. - Feb.              | 0.585               | 0.353 | 0.516    | 0.276 | 0.068      | 0.077 |
| Oilseed rape           | 2016-2017 | Feb. - May               | 0.529               | 0.384 | 0.529    | 0.342 | 0.000      | 0.042 |
| Wheat in monoculture   | 2015-2016 | Oct. - Dec.              | 0.427               | 0.330 | 0.425    | 0.142 | 0.002      | 0.188 |
| Wheat in monoculture   | 2015-2016 | Dec. - Feb.              | 0.444               | 0.294 | 0.416    | 0.190 | 0.028      | 0.104 |
| Wheat in monoculture   | 2015-2016 | Feb. - May               | 0.444               | 0.458 | 0.424    | 0.255 | 0.020      | 0.203 |
| Wheat in monoculture   | 2016-2017 | Jul. - Oct.              | 0.438               | 0.346 | 0.424    | 0.300 | 0.014      | 0.046 |
| Wheat in monoculture   | 2016-2017 | Oct. - Dec.              | 0.463               | 0.330 | 0.257    | 0.113 | 0.207      | 0.217 |
| Wheat in monoculture   | 2016-2017 | Dec. - Feb.              | 0.386               | 0.248 | 0.311    | 0.200 | 0.075      | 0.048 |
| Wheat in monoculture   | 2016-2017 | Feb. - May               | 0.344               | 0.332 | 0.341    | 0.213 | 0.004      | 0.120 |
| Wheat in rotation      | 2015-2016 | Oct. - Dec.              | 0.425               | 0.317 | 0.409    | 0.157 | 0.016      | 0.160 |
| Wheat in rotation      | 2015-2016 | Dec. - Feb.              | 0.472               | 0.266 | 0.370    | 0.185 | 0.102      | 0.081 |
| Wheat in rotation      | 2015-2016 | Feb. - May               | 0.505               | 0.347 | 0.432    | 0.311 | 0.073      | 0.035 |
| Wheat in rotation      | 2016-2017 | Jul. - Oct.              | 0.498               | 0.313 | 0.427    | 0.272 | 0.071      | 0.041 |
| Wheat in rotation      | 2016-2017 | Oct. - Dec.              | 0.541               | 0.287 | 0.292    | 0.214 | 0.249      | 0.073 |
| Wheat in rotation      | 2016-2017 | Dec. - Feb.              | 0.350               | 0.284 | 0.292    | 0.284 | 0.059      | 0.000 |
| Wheat in rotation      | 2016-2017 | Feb. - May               | 0.424               | 0.334 | 0.329    | 0.287 | 0.095      | 0.047 |
| Mean                   |           |                          | 0.496               | 0.341 | 0.436    | 0.234 | 0.060      | 0.107 |

**Figure S1** - Distribution of the most prevalent proteobacterial genera detected in wheat residues. **(A)** Cladogram of the most prevalent genera. Genera were filtered according to their occurrence (at least three times in five sampling points for each “crop within rotation \* cropping season \* sampling period” combination). Unclassified genera were removed from the tree. **(B)** Number of ASV for each genus. **(C)** Occurrence of each ASV in the 100 samples of wheat residues. **(D)** Number of reads for each genus. **(E)** Distribution of each genus in the five samples per date (increasing numbers of reads on a scale running from yellow to red).

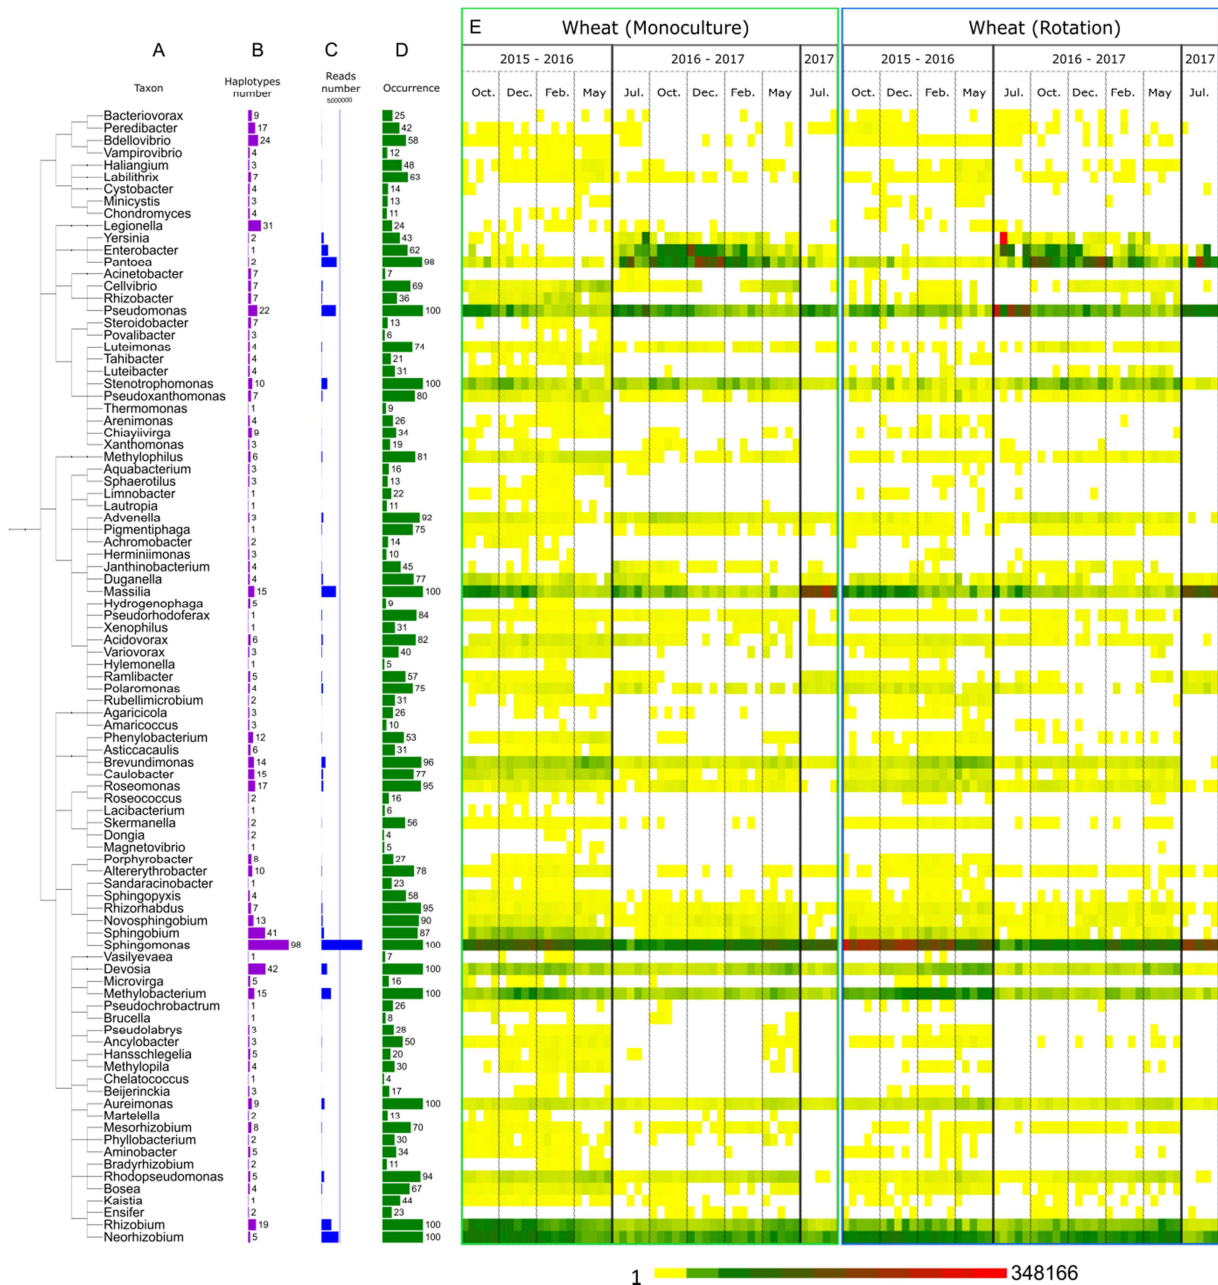

**Figure S2** - Distribution of the most prevalent Actinobacteria, Bacteroides, Firmicutes, Verrucomicrobia, Chlamydiae and Chloroflexi genera detected in wheat residues,. (A) Cladogram of the most prevalent genera. Genera were filtered according to their occurrence (at least three times in five sampling points for each “crop within rotation \* cropping season \* sampling period” combination). Unclassified genera were removed from the tree. (B) Number of ASV for each genus. (C) Occurrence of each ASV in the 100 samples of wheat residues. (D) Number of reads for each genus. (E) Distribution of each genus in the five samples per date (increasing number of reads shown on a scale running from yellow to red).

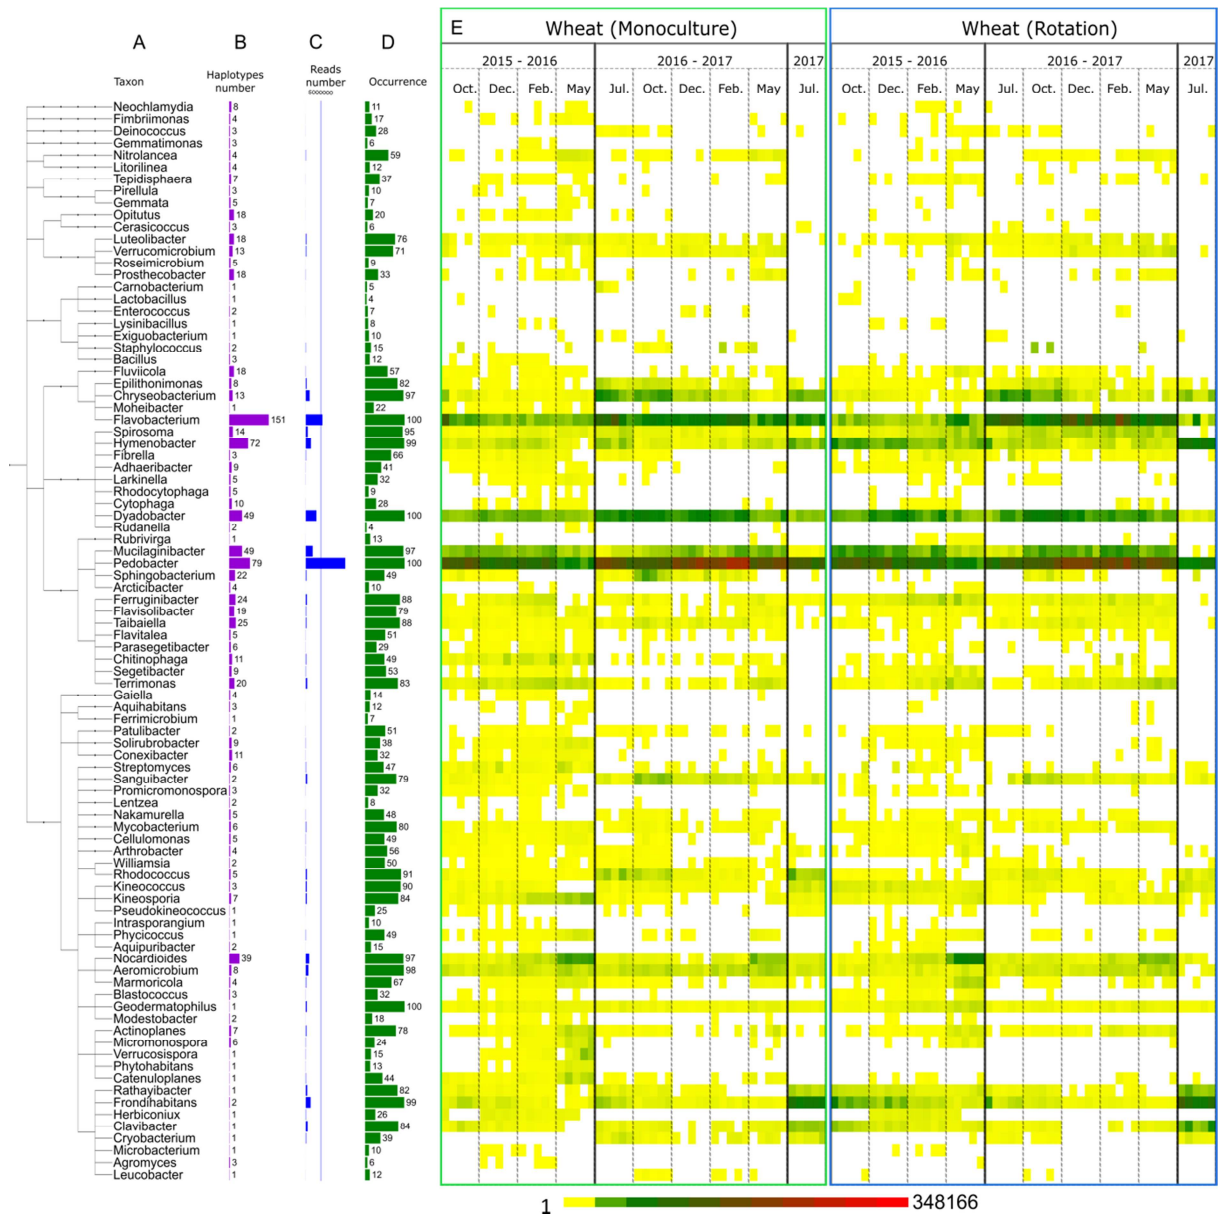

**Figure S3** - Distribution of the most prevalent proteobacterial genera detected in oilseed rape residues. **(A)** Cladogram of most prevalent genera. Genera were filtered according to their occurrence (at least three times in five sampling points for each “crop within rotation \* cropping season \* sampling period” combination). Unclassified genera were removed from the tree. **(B)** Number of ASV for each genus. **(C)** Occurrence of each ASV in the 49 samples of oilseed rape residues. **(D)** Number of reads for each genus. **(E)** Distribution of each genus in the five samples per date (increasing number of reads shown on a scale running from yellow to red).

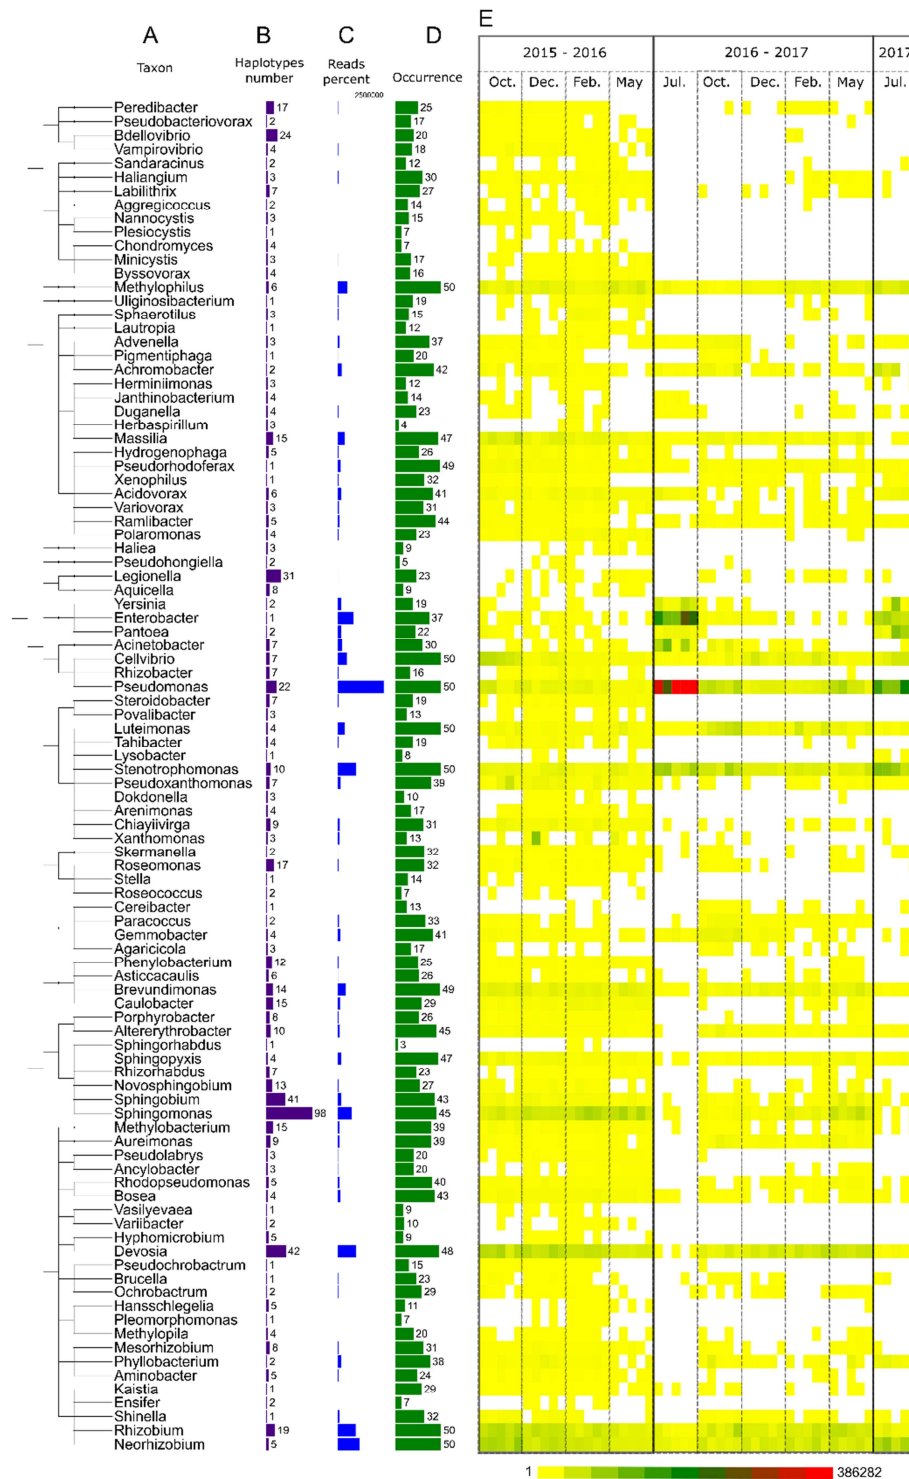

**Figure S4** - Distribution of the most prevalent Actinobacteria, Bacteroides, Firmicutes, Verrucomicrobia, Chlamydiae and Chloroflexi genera detected in oilseed rape residues. **(A)** Cladogram of the most prevalent genera. Genera were filtered according to their occurrence (at least three times in five sampling points for each “crop within rotation \* cropping season \* sampling period” combination). Unclassified genera were removed from the tree. **(B)** Number of ASV for each genus. **(C)** Occurrence of each ASV in the 49 samples of oilseed rape residues. **(D)** Number of reads for each genus. **(E)** Distribution of each genus in the five samples per date (increasing number of reads shown on a scale from yellow to red).

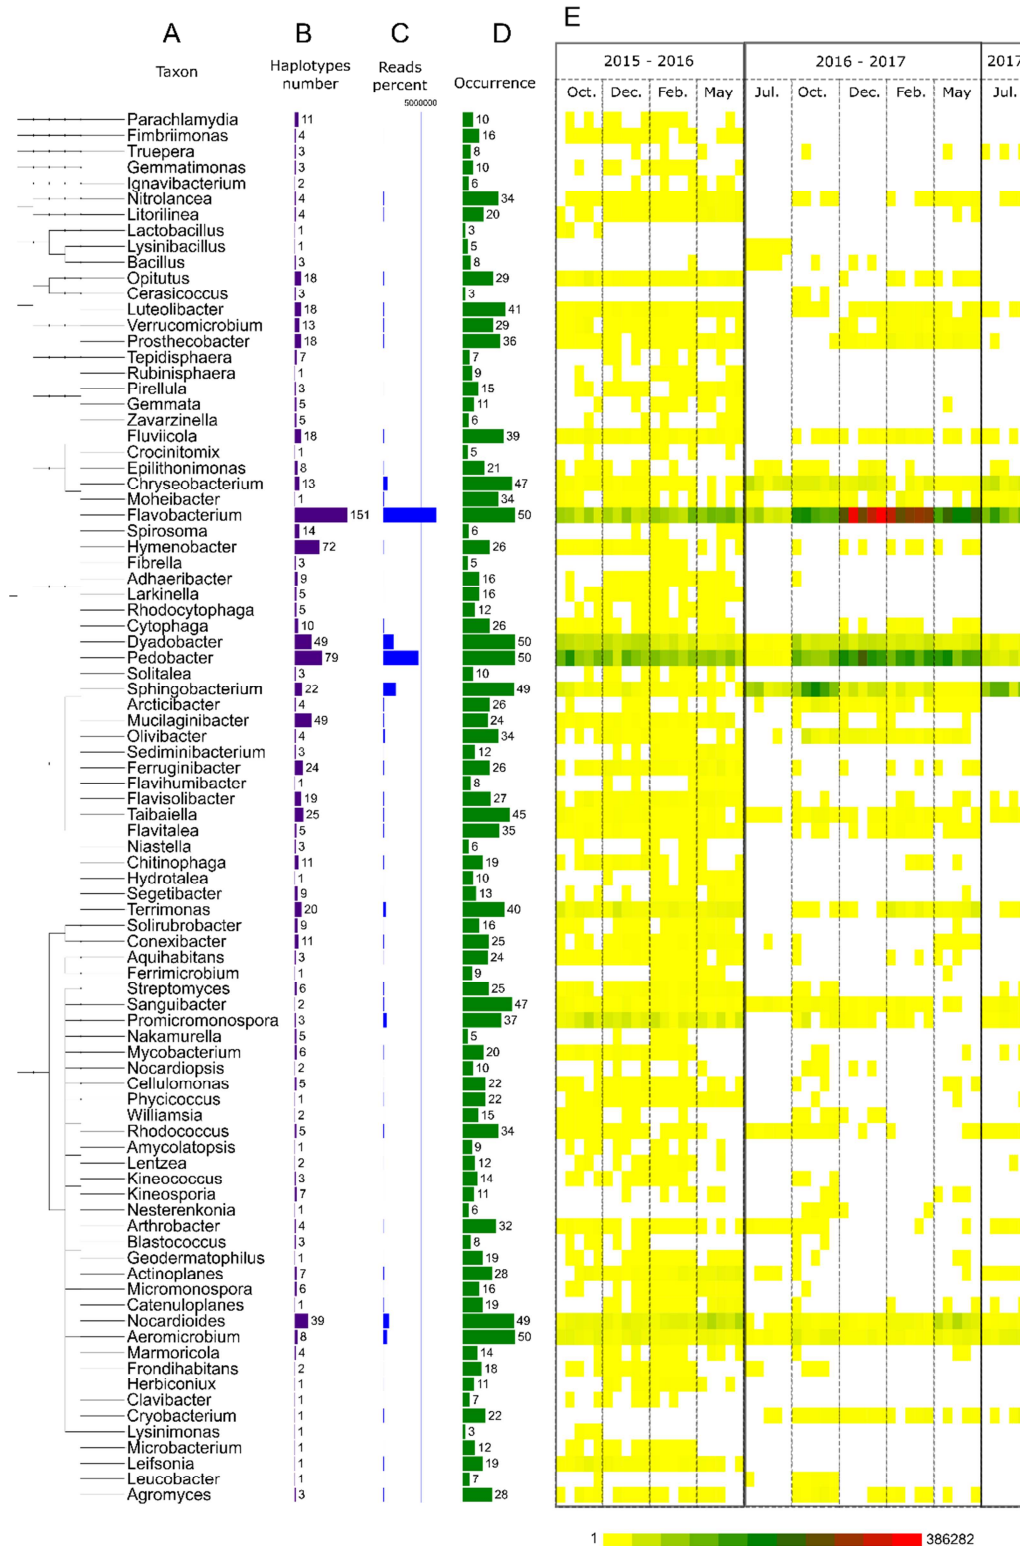

**Figure S5** - Seasonal shift in the relative abundance of a selection of fungal (**A**) and bacterial (**B**) genera present on wheat and oilseed rape residues according to the rotation (wheat monoculture [1], wheat in rotation [2], oilseed rape in rotation [3]) and the year (2015-2016, 2016-2017). Due to the high impact of the plant (wheat and oilseed rape) in the fungal community, the fungal genera used here as examples are different for the two plants, unlike the case of the bacterial community. Each box represents the distribution of genera relative abundance for the five sampling points. Samples not sharing letters are significantly different (Wilcoxon tests between sampling periods).

**A.1.**

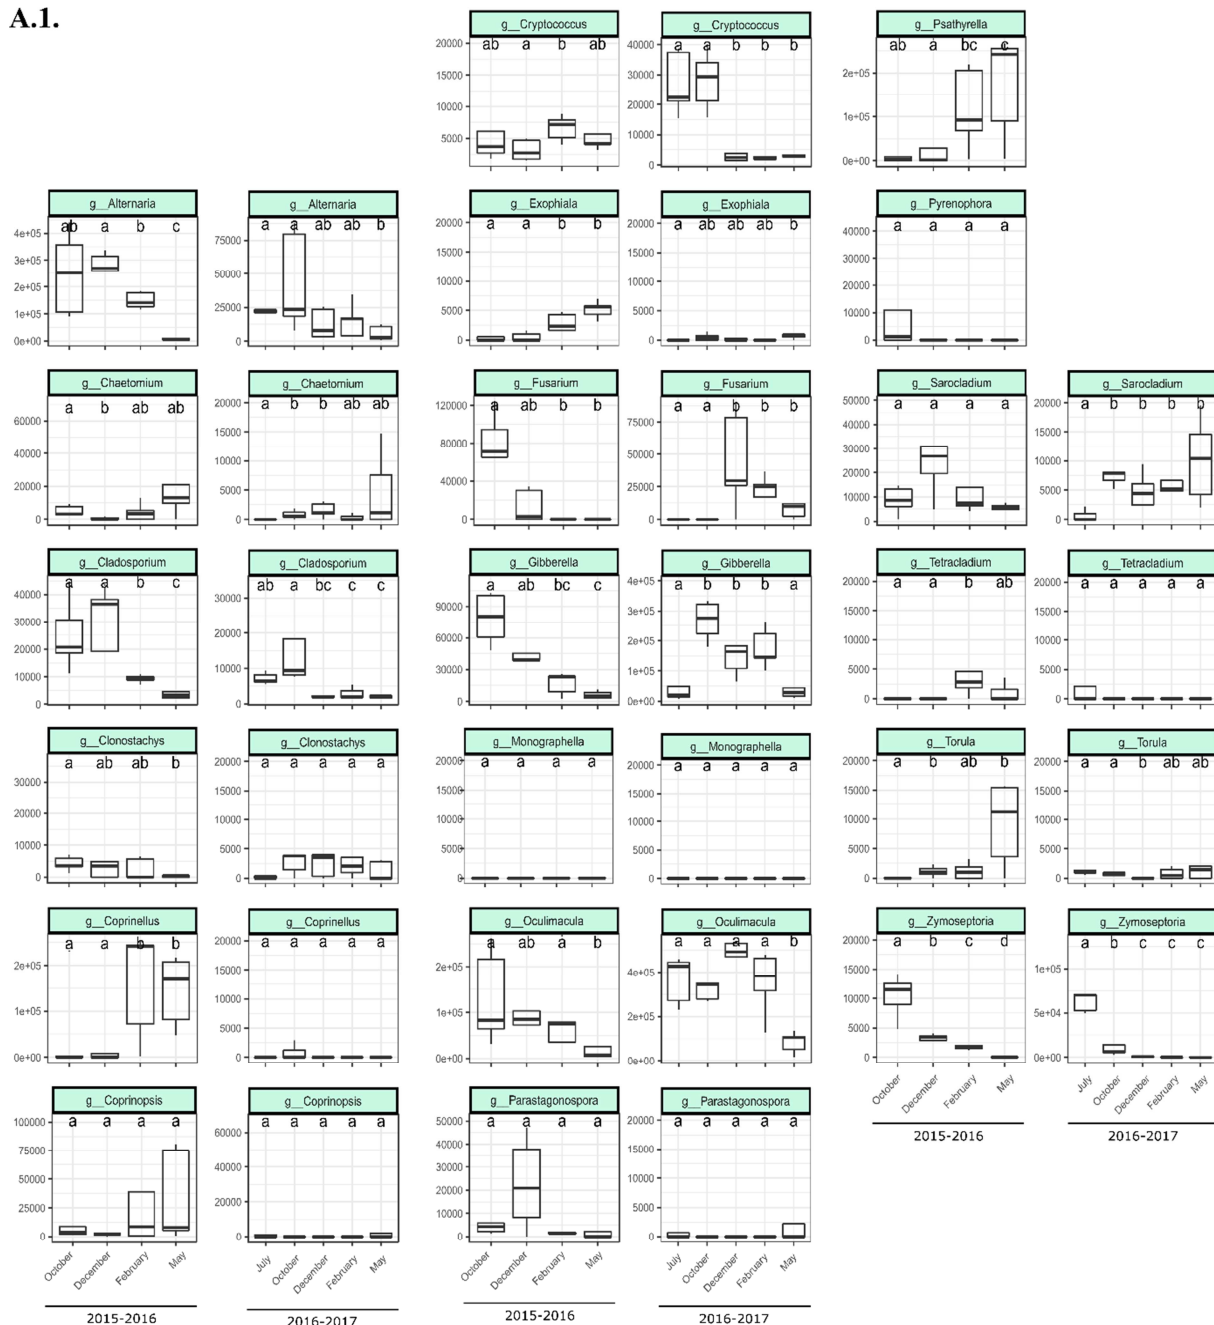

**A.2.**

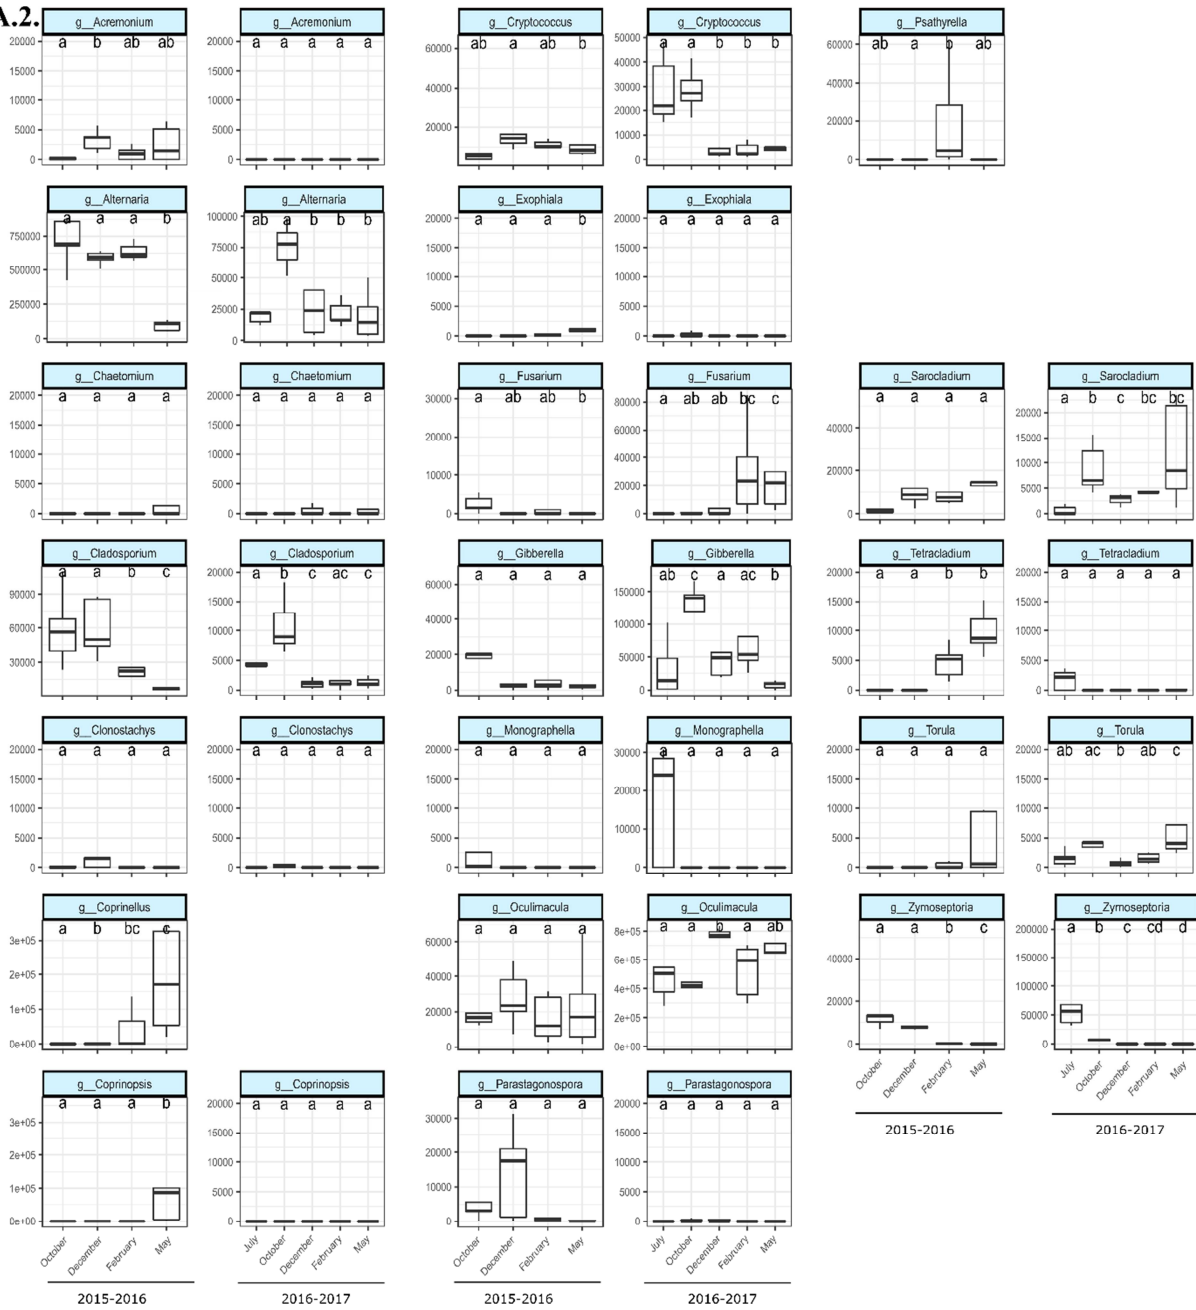

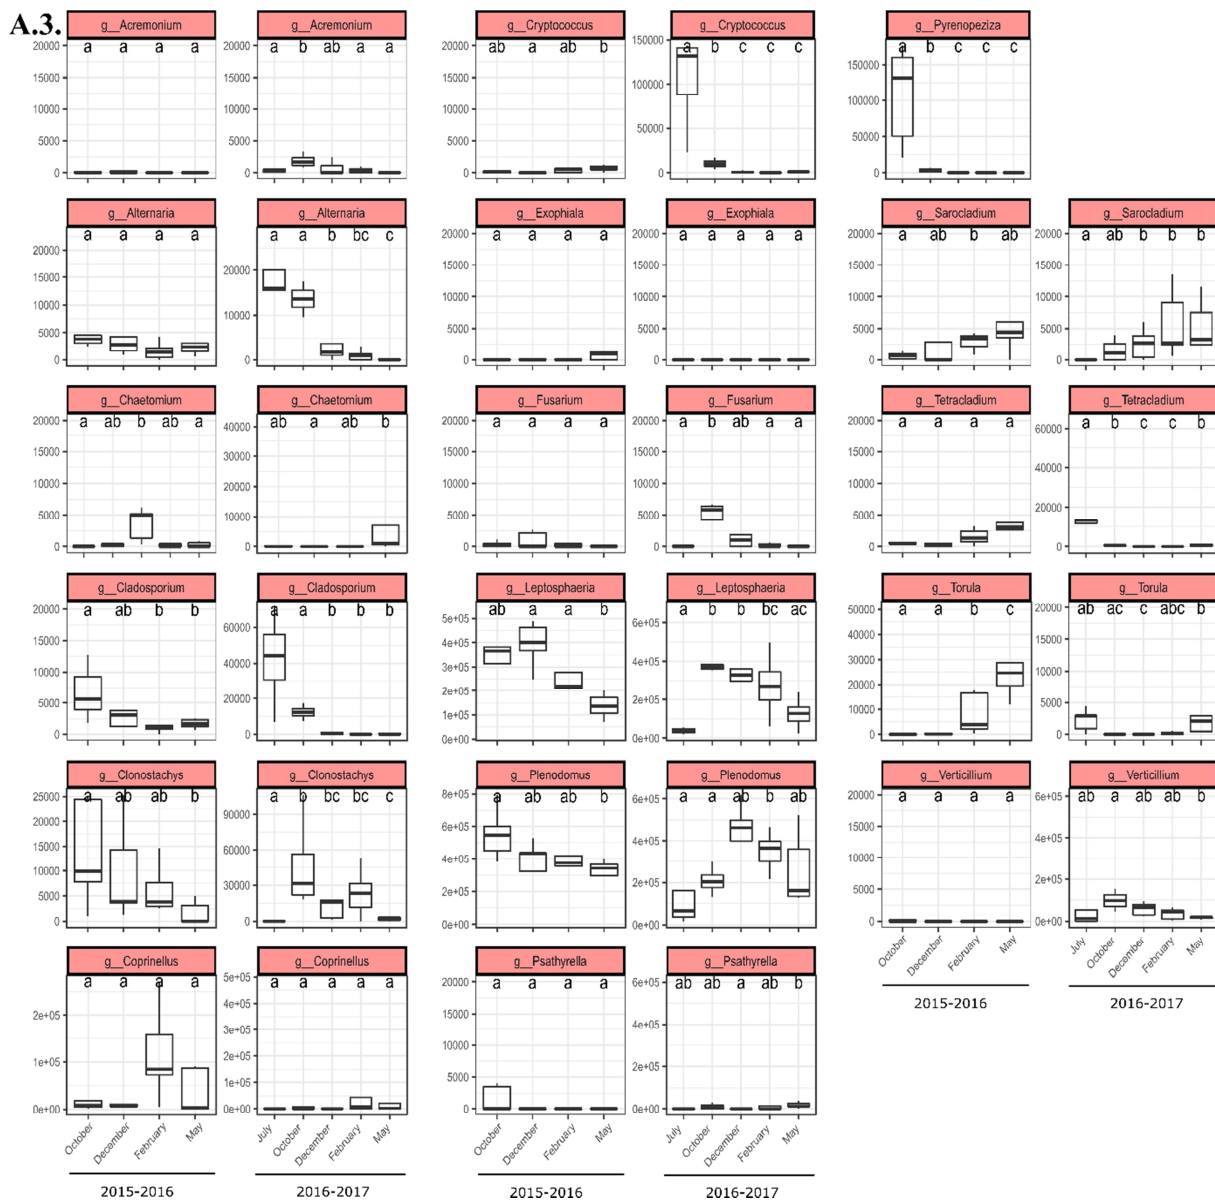



**B.1.**

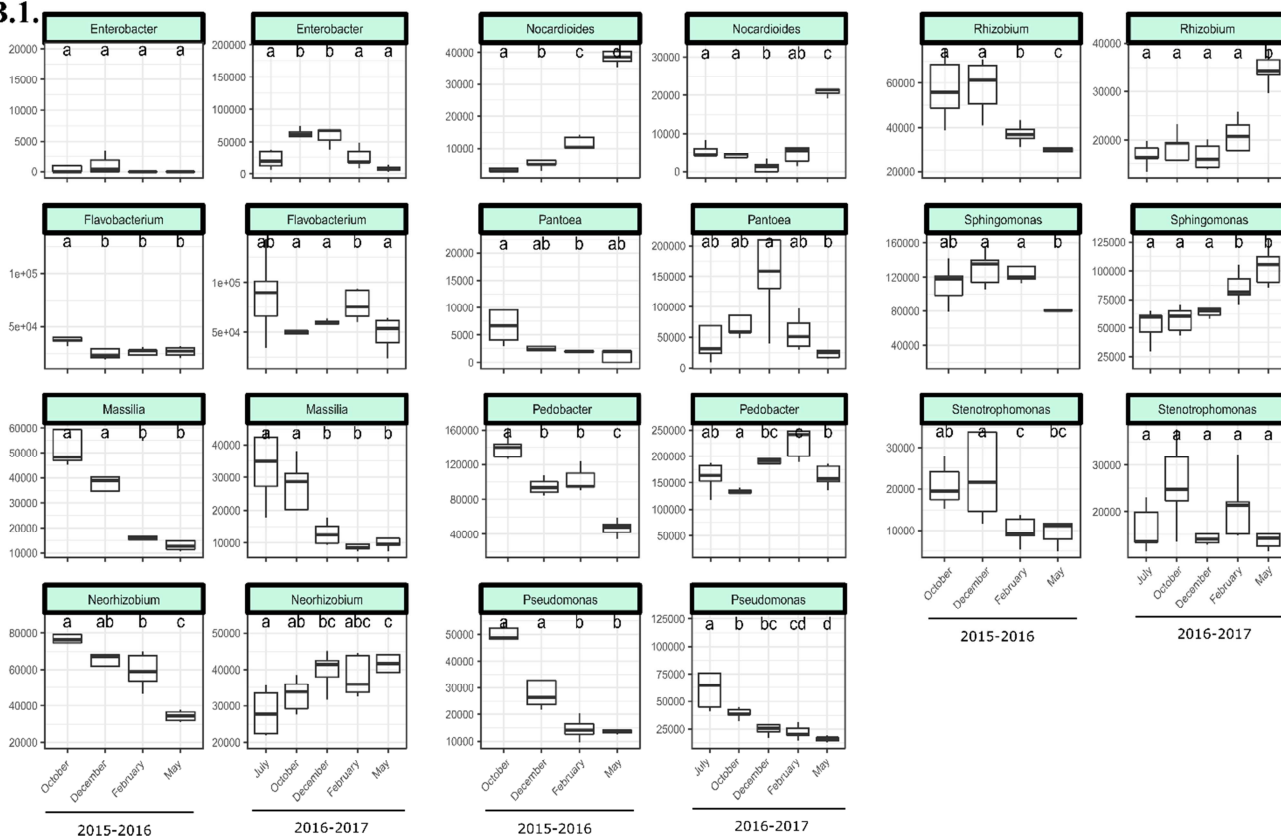

**B.2.**

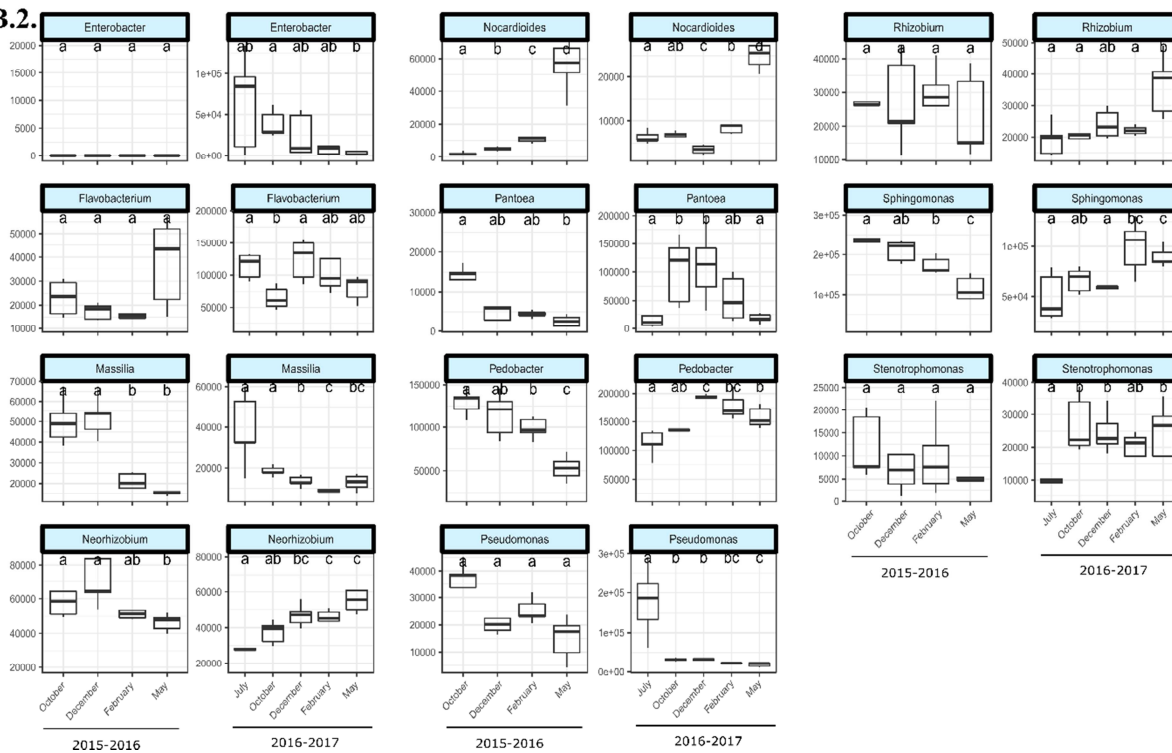

**B.3.**

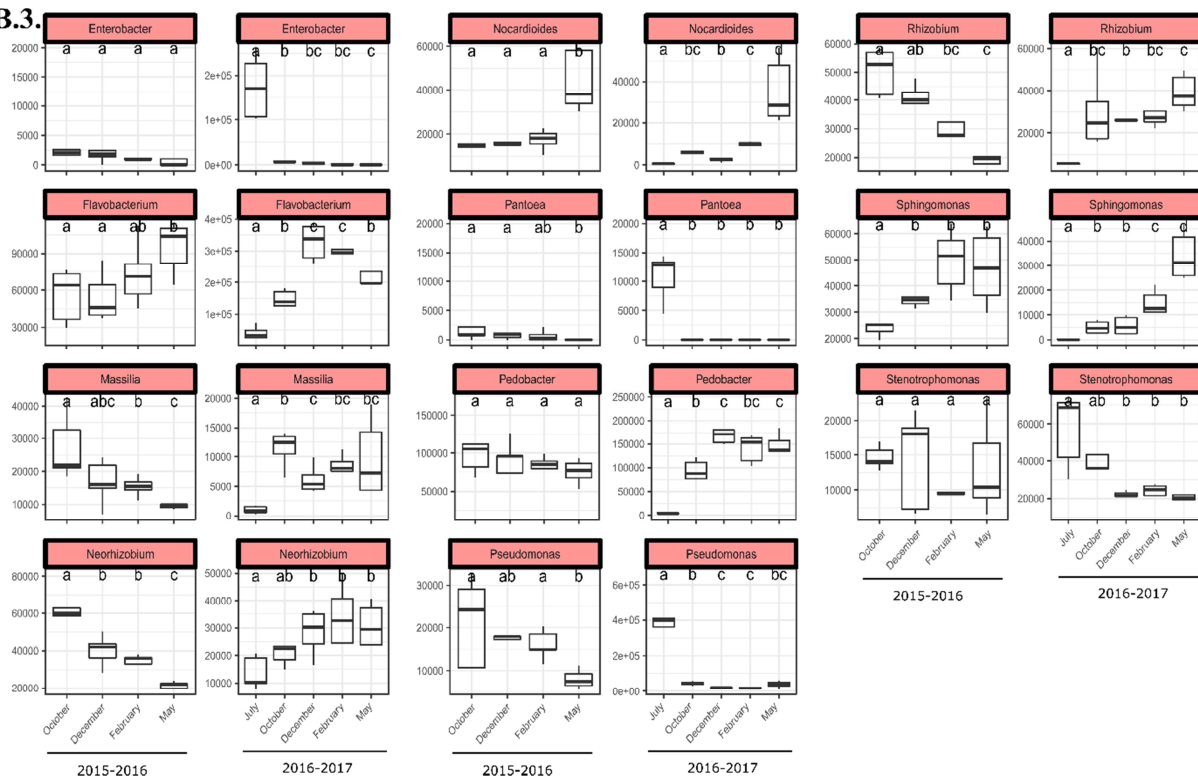

Source: http://biorxiv.org/content/10.1101/456178v1.full.pdf
